1           **Histone H2Bub1 deubiquitylation is essential for mouse development, but**  
2           **does not regulate global RNA polymerase II transcription**

3  
4           **Fang Wang<sup>1,2,3,4,\*</sup>, Farrah El-Saafin<sup>1,2,3,4,\*</sup>, Tao Ye<sup>1,2,3,4,5</sup>, Matthieu Stierle<sup>1,2,3,4</sup>,**  
5           **Luc Negroni<sup>1,2,3,4</sup>, Matej Durik<sup>1,2,3,4</sup>, Veronique Fischer<sup>1,2,3,4</sup>, Didier Devys<sup>1,2,3,4</sup>,**  
6           **Stéphane D. Vincent<sup>1,2,3,4</sup>, and László Tora<sup>1,2,3,4,#</sup>**

7

8           <sup>1</sup>Institut de Génétique et de Biologie Moléculaire et Cellulaire, 67404 Illkirch, France;

9           <sup>2</sup>Centre National de la Recherche Scientifique (CNRS), UMR7104, 67404 Illkirch,  
10           France;

11           <sup>3</sup>Institut National de la Santé et de la Recherche Médicale (INSERM), U1258, 67404  
12           Illkirch, France;

13           <sup>4</sup>Université de Strasbourg, 67404 Illkirch, France;

14           <sup>5</sup>Plateforme GenomEast, infrastructure France Génomique; 67404 Illkirch, France.

15

16           \*These authors contributed equally to this work

17           <sup>∞</sup>Present address: Olivia Newton-John Cancer Research Institute, Melbourne, Victoria,  
18           Australia

19

20           <sup>#</sup>Corresponding author: László Tora; Development and stem cells Department  
21           Institut de Génétique et de Biologie Moléculaire et Cellulaire (IGBMC), UMR 7104  
22           CNRS, INSERM U1258, Université de Strasbourg (Unistra), 1, rue Laurent Fries,  
23           67404 ILLKIRCH Cedex, FRANCE; Tel +33 3 88 65 34 44, Fax: +33 3 88 65 32  
24           01; e-mail: [laszlo@igbmc.fr](mailto:laszlo@igbmc.fr)

25

26 **Conflict of interest:** The authors declare no conflict of interest.

27

28 **Running Title:** H2Bub1 DUBs do not regulate transcription directly

29 **Key words:** histone, ubiquitin, deubiquitylase, SAGA (Spt-Ada-Gcn5 acetyltransferase)

30 complex, RNA polymerase II, transcription, ubiquitin-specific protease 22 (USP22),

31 knock-out, mouse embryo, development, mESC, MEF, RNA-seq, CHIP-seq.

32

33 **Funding:** This study was supported by grants from European Research Council (ERC)

34 (ERC-2013-Advanced grant 340551, Birtoaction), Agence Nationale de la Recherche (ANR)

35 PICen-19-CE11-0003-02 and EpiCAST-19-CE12-0029-01 grants, NIH 1R01GM131626-01

36 grant (to LT) and ANR-18-CE12-0026 grant (to DD), fellowships by the IdEx-University of

37 Strasbourg international PhD program and by the 'Fondation pour la Recherche Médicale'

38 (FRM) association (FDT201904008368) (to VF) and an ANR-10-LABX-0030-INRT grant, a

39 French State fund managed by the ANR under the frame program Investissements d'Avenir

40 ANR-10-IDEX-0002-02.

41

42 **Abstract**

43 Co-activator complexes dynamically deposit post-translational modifications  
44 (PTMs) on histones, or remove them, to regulate chromatin accessibility and/or to  
45 create/erase docking surfaces for proteins that recognize histone PTMs. SAGA (Spt-  
46 Ada-Gcn5 Acetyltransferase) is an evolutionary conserved multisubunit co-activator  
47 complex with modular organization. The deubiquitylation module (DUB) of mammalian  
48 SAGA complex is composed of the ubiquitin-specific protease 22 (USP22) and three  
49 adaptor proteins, ATXN7, ATXN7L3 and ENY2, which are all needed for the full activity  
50 of the USP22 enzyme to remove monoubiquitin (ub1) from histone H2B. Two additional  
51 USP22-related ubiquitin hydrolases (called USP27X or USP51) have been described to  
52 form alternative DUBs with ATXN7L3 and ENY2, which can also deubiquitylate  
53 H2Bub1. Here we report that USP22 and ATXN7L3 are essential for normal embryonic  
54 development of mice, however their requirements are not identical during this process,  
55 as *Atxn7l3*<sup>-/-</sup> embryos show developmental delay already at embryonic day (E) 7.5, while  
56 *Usp22*<sup>-/-</sup> embryos are normal at this stage, but die at E14.5. Global histone H2Bub1  
57 levels were only slightly affected in *Usp22* null embryos, in contrast H2Bub1 levels were  
58 strongly increased in *Atxn7l3* null embryos and derived cell lines. Our transcriptomic  
59 analyses carried out from wild type and *Atxn7l3*<sup>-/-</sup> mouse embryonic stem cells  
60 (mESCs), or primary mouse embryonic fibroblasts (MEFs) suggest that the ATXN7L3-  
61 related DUB activity regulates only a subset of genes in both cell types. However, the  
62 gene sets and the extent of their deregulation were different in mESCs and MEFs.  
63 Interestingly, the strong increase of H2Bub1 levels observed in the *Atxn7l3*<sup>-/-</sup> mESCs, or  
64 *Atxn7l3*<sup>-/-</sup> MEFs, does not correlate with the modest changes in RNA Polymerase II (Pol  
65 II) occupancy and lack of changes in Pol II elongation observed in the two *Atxn7l3*<sup>-/-</sup>

66 cellular systems. These observations together indicate that deubiquitylation of histone  
67 H2Bub1 does not directly regulate global Pol II transcription elongation.  
68

69 **Introduction**

70 During mouse embryonic development, dynamic modifications of the chromatin  
71 are essential, as the loss of chromatin modifying enzymes, both writers and erasers,  
72 can lead to embryonic lethality, although with different severity <sup>1</sup>. Histone H2B can be  
73 modified by the dynamic addition of a single ubiquitin (ub1) molecule on lysine 120 in  
74 mammals (H2Bub1). The deposition of mono-ubiquitin onto H2B is catalysed by the  
75 RNF20/RNF40 complex in mammals <sup>2, 3, 4</sup>. The exact cellular function(s) of the H2Bub1  
76 chromatin mark is not yet fully understood, however it was suggested that the H2Bub1  
77 weakens DNA-histone interactions and therefore disrupts chromatin compaction <sup>5</sup>.  
78 H2Bub1 mark was suggested to play a role in several DNA-related and epigenetically  
79 regulated processes, such as transcription, repair, replication, homologous  
80 recombination, as well as in mRNA processing and export <sup>6, 7, 8, 9, 10, 11, 12, 13, 14, 15</sup>.  
81 Indeed, chromatin immunoprecipitation coupled to sequencing studies revealed that  
82 H2Bub1 is found at gene bodies of expressed genes and is absent from non-expressed  
83 chromosomal regions, suggesting that H2Bub1 may be involved in transcription  
84 elongation <sup>16, 17, 18, 19, 20</sup>. Intriguingly however, when H2Bub1 deposition was disrupted in  
85 mammalian cells by knock-down of RNF20 or knock-out of RNF40, the expression of  
86 only a small subset of genes was affected <sup>7, 12, 21</sup>. H2Bub1 has also been implicated in  
87 histone crosstalk and shown to be a prerequisite for trimethylation of histone 3 lysine 4  
88 (H3K4me3) around promoter regions both in yeast and mammalian cells <sup>22, 23, 24, 25, 26, 27</sup>.  
89 H2Bub1 is erased by the deubiquitylation module (DUB) of the co-activator SAGA  
90 (Spt-Ada-Gcn5 acetyltransferase) complex <sup>28, 29, 30, 31</sup>, composed of the ubiquitin-specific  
91 protease 22 (USP22) and the ATXN7, ATXN7L3 and ENY2 adaptor proteins, needed  
92 for the full activity of USP22 enzyme <sup>32</sup>. ATXN7L3 is critical for directing the DUB

93 module substrate specificity towards H2Bub1<sup>33</sup>. In human cells, depletion of either  
94 ENY2 or ATXN7L3 adaptor protein resulted in a non-functional USP22 enzyme<sup>15, 19, 32,</sup>  
95 <sup>34</sup>. Two additional USP22-related ubiquitin hydrolases (called USP27X or USP51) can  
96 also interact with ATXN7L3 and ENY2, and deubiquitylate H2Bub1 independently of the  
97 SAGA complex<sup>34</sup>. Thus, in mammalian cells the cellular abundance of H2Bub1 is  
98 regulated by the opposing activities of the ubiquitin E3 ligase complex, RNF20/RNF40,  
99 and three related DUB modules, each containing one of the homologous  
100 deubiquitylases: USP22, USP27X or USP51<sup>34, 35</sup>. These different DUB modules have  
101 also non-histone substrates<sup>36, 37, 38, 39, 40, 41, 42, 43</sup>. As *Usp22*<sup>-/-</sup> mouse embryos die  
102 around embryonic day (E) E14.5<sup>40, 44, 45</sup>, the alternative USP27X- and/or USP51-  
103 containing DUB modules cannot completely fulfil the role of the USP22-containing DUB  
104 module. *Usp22*<sup>-/-</sup> mouse studies suggest that USP22 is required to regulate apoptosis  
105 by deubiquitylating/stabilizing the SIRT1 histone deacetylase and by suppressing p53  
106 functions during embryogenesis, and/or by regulating key signalling pathways crucial for  
107 mouse placenta vascularization<sup>40, 44</sup>.

108 To better understand the role of USP22- and/or ATXN7L3-containing DUB  
109 modules *in vivo*, we have generated mice lacking USP22 or ATXN7L3. *Atxn7l3*<sup>-/-</sup>  
110 embryos show developmental delay as early as E7.5, while *Usp22*<sup>-/-</sup> embryos are  
111 normal at this stage, and die at E14.5 similarly to previous publications<sup>40, 44</sup>. These  
112 results indicate that USP22 and ATXN7L3 are essential for normal development,  
113 however their requirements are not identical. H2Bub1 levels were only slightly affected  
114 in *Usp22*<sup>-/-</sup> embryos, while in contrast they strongly increased in *Atxn7l3*<sup>-/-</sup> embryos and  
115 derived cellular systems. The genome-wide increase of H2Bub1 retention in mESCs  
116 and MEFs lacking ATXN7L3 was investigated and the consequences of *Atxn7l3* loss of

117 function on cellular homeostasis, differentiation, and RNA polymerase II (Pol II)  
118 transcription were analysed.

119

## 120 **Materials and Methods**

### 121 **Generation and maintenance of *Usp22*<sup>+/-</sup> and *Atxn713*<sup>+/-</sup> mouse lines**

122 *Usp22*<sup>+/-</sup> and *Atxn713*<sup>+/-</sup> mouse lines were generated at the Institut Clinique de la  
123 Souris (ICS, Illkirch, France) using mESCs containing the targeting constructs ordered  
124 from the International Knockout Mouse Consortium (IKMC), including the Knockout  
125 Mouse Programme (KOMP) repository (UC, Davis). In the *Usp22* targeting construct  
126 (*Usp22*<sup>tm1a(KOMP)Wtsi</sup>) a *LacZ* and *Neo* cassette were located in intron 1, flanked by *FRT*  
127 sequences, and *loxP* sequences were flanking exon 2 (Supplementary Fig. 1A). In the  
128 *Atxn713* targeting construct (*Atxn713*<sup>tm1.1(KOMP)Wtsi</sup>) a *LacZ* and *Neo* cassette were located  
129 in intron 2, flanked by *FRT* sequences, and the *LoxP* sequences were flanking exon 2 to  
130 exon 12 (Supplementary Fig. 1C). Chimeras were generated by injecting the C57BL/6  
131 mESCs containing the targeting constructs into BALB/c blastocysts. Mice heterozygous  
132 for the targeting allele were crossed to a Cre-, or FLP-recombinase deleter strains, in  
133 order to generate the null alleles *Usp22*<sup>-</sup> and *Atxn713*<sup>-</sup>, respectively. Then mice  
134 heterozygous for the null allele (*Usp22*<sup>+/-</sup>, or *Atxn713*<sup>+/-</sup>) were intercrossed to generate  
135 homozygous mutant embryos (*Usp22*<sup>-/-</sup> or *Atxn713*<sup>-/-</sup>) as shown in Supplementary Fig. 1A  
136 and 1C. Investigators were not blinded for animal experimentation and no  
137 randomization was used as all the conditions were processed at the same time.  
138 Genotyping primers are shown in Supplementary Table 1, and examples of genotyping  
139 gels are shown in Supplementary Fig. 1B and 1D. *Atxn713*<sup>+/-</sup> mice were maintained on a  
140 mixed B6D2 background. Animal experimentation was carried out according to animal

141 welfare regulations and guidelines of the French Ministry of Agriculture and French  
142 Ministry of Higher Education, Research and Innovation.

143 **Generation and maintenance of *Atxn7l3*<sup>-/-</sup> mESCs and *Atxn7l3*<sup>-/-</sup> MEFs**

144 To generate *Usp22*<sup>-/-</sup>, *Atxn7l3*<sup>-/-</sup> and wild-type (WT) mESCs, timed matings  
145 between heterozygous mice were conducted, then at E3.5, pregnant females were  
146 sacrificed, uteri were flushed with M2 medium (Sigma-Aldrich), and individual  
147 blastocysts were transferred to wells of a 96-well plates pre-coated with 0.1% gelatin.  
148 Blastocysts were cultured and expanded in regular mESCs medium [DMEM (4.5 g/l  
149 glucose) with 2 mM Glutamax-I, 15% ESQ FBS (Gibco), penicillin, streptomycin, 0.1  
150 mM non-essential amino acids, 0.1% β-mercaptoethanol, 1500 U/mL LIF and two  
151 inhibitors (2i; 3 μM CHIR99021 and 1 μM PD0325901, Axon MedChem)]. After  
152 expansion, mESCs were genotyped and frozen.

153 To generate *Atxn7l3*<sup>-/-</sup> and WT MEFs, timed matings between heterozygous mice  
154 were conducted, then at E10.5, pregnant females were sacrificed, and embryos were  
155 collected. The embryo yolk sacs were collected for genotyping, and the head and  
156 gastrointestinal tract were carefully dissected away from embryos. The remaining  
157 carcasses were transferred to individual 1.5 ml Eppendorf tubes, and 50 μl of 0.25%  
158 trypsin-EDTA (Gibco) was added and gently triturated 5 times to dissociate the  
159 embryos. The dissociated embryos were incubated in trypsin for 5 min at room  
160 temperature, then the trypsin was quenched with 500 μl of FCS. Cells were transferred  
161 to individual wells of a 6-well plate pre-coated with 0.1% gelatin and cultured in MEF  
162 medium (DMEM, 10% FCS, penicillin and streptomycin). Cells were visualized with an  
163 EVOS XL Core Cell Imaging System (#AMEX-1100, Thermo Fisher Scientific) using a  
164 LPlan PH2 10x / 0.25 objective.



165 **Protein extraction and Western blot assays**

166 To extract histone proteins, embryos dissected at the indicated embryonic days, or  
167 about  $5 \times 10^6$  cells (were lysed with 100  $\mu$ l acidic extraction buffer (10 mM Hepes, pH  
168 7.9, 1.5 mM  $MgCl_2$ , 10 mM KCl, 0.5 mM DTT and 0.2 M HCl) freshly complemented with  
169  $1\times$  Proteinase Inhibitor Cocktail (Roche) and 10 mM N-ethylmaleimide (Sigma-Aldrich).  
170 HCl was added to a final concentration of 0.2 M and incubated on an end-to-end rotator  
171 for 2 hours at 4°C. Following the incubation, cell extract was centrifuged at 20 800 x g  
172 for 10 min at 4°C, to pellet the acid insoluble material. A solution of 2 M Tris-HCl (pH  
173 8.8) was added to neutralize the supernatant of the acidic extraction. Ten  $\mu$ l of the  
174 supernatant, containing histone proteins, were run on 4–12% gels (Bis-tris NuPAGE  
175 Novex, Life Technologies), then proteins were transferred and western blot assays were  
176 carried out by using standard methods. The following antibodies were used: anti-H3  
177 (Abcam #ab1791) anti-H4 (Invitrogen 3HH4-4G8), anti-H2Bub1 (Cell Signaling  
178 Technology, #5546), anti-H3K4me3 (Abcam ab8580), anti-H3K9ac (Merck-Millipore  
179 #07-352), Peroxidase AffiniPure F(ab') $\square$  Fragment Goat Anti-Mouse IgG, Fcy fragment  
180 specific (Jackson ImmunoResearch #115-036-071) and Peroxidase AffiniPure Goat  
181 Anti-Rabbit IgG (H+L) (Jackson ImmunoResearch #115-035-144). Protein levels were  
182 quantified by ImageJ.

183 **Actin labelling**

184 Cells were washed twice with 1x PBS, fixed with 4% PFA (Electron Microscopy  
185 Science) for 10 min at room temperature (RT). After fixation, cells were washed three  
186 times with 1x PBS, permeabilized with sterile 0.1% Triton X-100 in PBS for 20 min at  
187 RT, then washed three times in 1x PBS. Cells were incubated either with phalloidin  
188 conjugated to Alexa 488 dye (Phalloidin-iFluor 488, Abcam ab176753) following the

189 manufacturer's protocol, to label F-actin filaments, or with an anti- $\beta$ -actin mouse  
190 monoclonal antibody (Sigma Aldrich, A5441) at a dilution of 1:1000 in 1x PBS with 10%  
191 FCS, overnight at 4°C. The following day, cells were washed three times with 1x PBS,  
192 then  $\beta$ -actin labelled cells were further incubated with secondary Alexa Fluor 488 goat  
193 anti-mouse Ig (Invitrogen #A-1101) at a dilution of 1:2000 in 1x PBS with 10% FCS for 1  
194 hr at RT. The cells were washed three times with 1x PBS, then incubated in 20 mM  
195 Hoechst 3342 (Thermo Scientific) for 10 min at RT, before being washed three times  
196 with 1x PBS, then cells were covered with a coverslip coated in ProLong Gold mounting  
197 medium (Invitrogen). Pictures were taken using a Leica DM 4000 B upright microscope  
198 equipped with a Photometrics CoolSnap CF Color camera with a HCX PL S-APO  
199 20x/0.50 objective.

#### 200 **Colony formation assay and alkaline phosphatase staining**

201 Four thousand mESCs were seeded on gelatin-coated 6-well plates in regular  
202 mESC medium (see above) to form colonies at low density. The medium was  
203 exchanged every two days for 6 days. Alkaline phosphatase (AP) activity test was  
204 performed using Red Substrate Kit, Alkaline Phosphatase (Vector Laboratories)  
205 according to the manufacturer's instructions: mESC clones were washed with 1x cold  
206 PBS and fixed with 4% PFA for 10 min at RT. After fixation, cells were washed twice  
207 with H<sub>2</sub>O and incubated in 1 ml AP detection system for 30 min at RT in the dark. Then  
208 cells were washed twice with cold 1x PBS, and visualized with an EVOS XL Core Cell  
209 Imaging System (#AMEX-1100, Thermo Fisher Scientific) using a LPlan PH2 4x / 0.13  
210 objective.

#### 211 **Cell proliferation analysis**

212 To determine cell proliferation, a total of  $1 \times 10^5$  mESCs per 6-well plate were  
213 seeded in regular mESC medium and  $3 \times 10^4$  passage 2-MEFs per 24-well plate were  
214 seeded in MEF medium. The medium was exchanged every two days. Cell numbers  
215 were counted with Countess cell counting chambers (Invitrogen). Statistical analyses  
216 were determined by a Mann-Whitney test (ns  $p > 0.05$ ; \*  $p \leq 0.05$ ; \*\*  $p \leq 0.01$ ; \*\*\*  $p \leq$   
217 0.001).

### 218 **Cell cycle analysis**

219 Hundred thousand mESCs were fixed in 70% EtOH overnight at  $-4^\circ\text{C}$ . After  
220 fixation, cells were treated with RNase A (100  $\mu\text{g/ml}$ ) (Thermo Fisher Scientific,  
221 #EN0531) and stained with propidium iodide (40  $\mu\text{g/ml}$ ) (Sigma Aldrich, #P-4170) for 30  
222 min at  $37^\circ\text{C}$ . The acquisition of the DNA content was analysed on FACS CALIBUR (BD  
223 Sciences) flow cytometer. Quantitative results were analyzed by FlowJo software (BD  
224 Sciences).

### 225 **Apoptosis analysis using annexin-V staining**

226 At the indicated incubation time, floating cells were collected in culture  
227 supernatants and adherent cells were harvested by trypsinization. After collection, cells  
228 were washed twice with cold 1X PBS, and about  $2 \times 10^5$  cells were resuspended in 100  
229  $\mu\text{l}$  binding buffer (FITC Annexin V Apoptosis Detection Kit, Biolegend). Subsequently, 5  
230  $\mu\text{l}$  FITC Annexin V (FITC Annexin V Apoptosis Detection Kit, Biolegend) and 10  $\mu\text{l}$   
231 propidium iodide was added to the cell suspension. Cells were gently vortexed and  
232 incubated in the dark for 15 min at RT. Thereafter, another 400  $\mu\text{l}$  Annexin V binding  
233 buffer was added to each tube. Cells were analysed using a FACS CALIBUR (BD  
234 Sciences) flow cytometer. Dot plots were generated using the FlowJo software.

### 235 **Statistics**

236 Statistical analysis of WT versus mutant samples comparison (cell proliferation  
237 and H2Bub1 density) was performed using non-parametric two-sided Wilcoxon rank  
238 sum test with continuity correction using R (version 5.3). No multiple comparisons were  
239 performed therefore no multiple correction were applied. Statistical results were  
240 expressed as *P* value or *P* value ranges (ns,  $p > 0.05$ ; \*,  $p \leq 0.05$ ; \*\*,  $p \leq 0.01$ ; \*\*\*,  $p \leq$   
241 0.001). Bar plot graphical data were represented as mean +/- SD and individual data  
242 points. Proliferation graphical data were represented as mean +/- SD. H2Bub1 density  
243 data were represented as box plots

244 Statistical analysis of the RNA-seq datasets was performed using a Wald test  
245 (DESeq2, see below).

#### 246 **Enrichment of ubiquitylated peptides and quantification of H2Bub1 peptides**

247 Forty million MEFs were harvested, washed three times with PBS and lysed in 1%  
248 SDS 0.1 M Tris pH 8 DTT 50 mM, 1× Proteinase Inhibitor Cocktail (Roche) and 50 mM  
249 PR-619 DUB inhibitor (UBPBio). The whole-cell lysate was precipitated with TCA and  
250 the pellet was washed twice with cold acetone then dried with Speed Vacuum system  
251 and weighted. Ten mg of the protein pellet was dissolved in 8 M urea, 5 mM TCEP then  
252 alkylated with 10 mM iodoacetamide. Sample was first digested with endoproteinase  
253 Lys-C (Wako) at a 1/500 enzyme/protein ratio (w/w) for 4h, then diluted four times  
254 before overnight trypsin digestion (Promega) at a 1:100 ratio. The resulting peptide  
255 mixture was desalted on C18 spin-column, quantified with Quantitative Colorimetric  
256 Peptide Assay (Thermo Fischer Scientific) and dried on Speed-Vacuum before  
257 enrichment with Ubiquitin Remnant Motif (K-ε-GG) Kit (Cell Signaling). After Sep Pak  
258 desalting, peptides were analyzed in triplicate using an Ultimate 3000 nano coupled in  
259 line with an Orbitrap ELITE (Thermo Scientific, San Jose California). Briefly, peptides

260 were separated on a C18 nano-column with a 90 min linear gradient of acetonitrile and  
261 analyzed with Top 20 CID (Collision-induced dissociation) data-dependent acquisition  
262 method. Data were processed by database searching against Mus musculus Uniprot  
263 Proteome database ([www.uniprot.org](http://www.uniprot.org)) using Proteome Discoverer 2.2 software  
264 (Thermo Fisher Scientific). Precursor and fragment mass tolerance were set at 7 ppm  
265 and 0.6 Da respectively. Trypsin was set as enzyme, and up to 2 missed cleavages  
266 were allowed. Oxidation (M, +15.995), GG (K, +114.043) were set as variable  
267 modification and Carbamidomethylation (C) as fixed modification. Proteins and peptides  
268 were filtered with False Discovery Rate <1% (high confidence). Lastly quantitative  
269 values were obtained from Extracted Ion Chromatogram (XIC) and exported in Perseus  
270 for statistical analysis <sup>46</sup>.

#### 271 **RNA-seq and CHIP-seq analyses**

272 For RNA-seq, total RNA was extracted from mESCs and MEFs (3 biological  
273 replicates of WT and *Atxn713*<sup>-/-</sup> for each cell types) using the NucleoSpin RNA isolation  
274 kit (Macherey-Nagel), according to manufacturer's instructions. Libraries were  
275 generated from the purified RNA using TruSeq Stranded mRNA (Illumina) protocol.  
276 After checking the quality of the libraries with the Bioanalyser (Agilent), libraries were  
277 sequenced on the Illumina HiSeq 4000 at the GenomEast sequencing platform of  
278 IGBMC. The raw sequencing data generated reads were preprocessed in order to  
279 remove adapter, poly(A) and low-quality sequences (Phred quality score below 20),  
280 then were mapped to the mouse mm10 genome using STAR <sup>47</sup>. After PCA analysis,  
281 one WT ESCs dataset was excluded because it did not cluster with the other biological  
282 replicates. Differentially expressed genes were measured using the DESeq2 package  
283 <sup>48</sup>. For the downstream analysis, only the transcripts which base median over 10

284 normalized reads (DESeq2 normalized reads divided by the median of the transcript  
285 length in kb) were considered. Using these criteria 16269 transcripts were expressed in  
286 mESCs, and 15084 transcripts were expressed in MEFs.

287       ChIP-seq experiments were performed using the protocol described in <sup>49</sup>, with  
288 some minor modifications, including the use of 10 mM N-ethylmaleimide (NEM, Sigma-  
289 Aldrich) in all buffers and the use of either the anti-H2Bub1 antibody (MediMabs,  
290 NRO3), the anti-RPB1 CTD Pol II antibody (1PB 7G5 <sup>50</sup>) from control and *Atxn7l3*<sup>-/-</sup>  
291 mESCs and MEFs (n=1, each) or the anti-Ser2P CTD Pol II antibody (3E10 <sup>51</sup>) from  
292 control and *Atxn7l3*<sup>-/-</sup> mESCs (n=1, each). Briefly, mESCs or MEFs were fixed in 1%  
293 PFA for 10 min at RT, then the PFA was quenched with glycine at a final concentration  
294 of 125 mM for 5 min at RT. Cells were washed two times in 1× cold PBS, scraped, and  
295 pelleted. Nuclei were isolated by incubating cells with nuclear isolation buffer [50 mM  
296 Tris-HCl pH 8.0, 2 mM EDTA pH 8.0, 0.5% Nonidet P-40, 10% glycerol, Proteinase  
297 Inhibitor Cocktail (Roche), 10 mM NEM (and 1× PhosSTOP only in Pol II Ser2P ChIP  
298 samples)] for 10 min at 4°C with gentle agitation, followed by centrifugation at maximum  
299 speed to pellet the nuclei. Nuclei were resuspended in sonication buffer [0.1% SDS, 10  
300 mM EDTA, 50 mM Tris-HCl pH 8.0, 1× Proteinase Inhibitor Cocktail, 10 mM NEM (and  
301 1× PhosSTOP only in Pol II Ser2P ChIP samples)]. Then chromatin was sheared with  
302 the E220 sonicator (Covaris) and chromatin concentration was measured with the Qubit  
303 3.0 (Thermo Fischer Scientific). Approximately of 50 µg of chromatin was used for Pol II  
304 or H2Bub1 ChIP, and 240 µg of chromatin was used for Pol II Ser2P ChIP which were  
305 diluted in ChIP dilution buffer [0.5% Nonidet P-40, 16.7 mM Tris-HCl pH 8.0, 1.2 mM  
306 EDTA, 167 mM NaCl, 1× Proteinase Inhibitor Cocktail, 10 mM NEM (and 1×  
307 PhosSTOP in Pol II Ser2P ChIP samples)]. Antibodies were incubated with the

308 chromatin overnight with gentle agitation at 4°C. The next day, Dynabeads protein G  
309 magnetic beads (Invitrogen) were added for 1 hour, then were isolated and washed for  
310 5 min at 4°C, three times with low salt wash buffer (0.1% SDS, 0.5% Nonidet P-40, 2  
311 mM EDTA, 150 mM NaCl, 20 mM and Tris-HCl pH 8.0), three times with high salt  
312 wash buffer (0.1% SDS, 0.5% Nonidet P-40, 2 mM EDTA, 500 mM NaCl, 20 mM and  
313 Tris-HCl pH 8.0), and once with LiCl wash buffer (0.2 M LiCl, 0.5% Nonidet P-40, 0.5%  
314 sodium deoxycholate, 1 mM EDTA, 10 mM Tris-HCl pH8.0), then washed three times  
315 with TE buffer, then the beads were incubated in elution buffer (1% SDS, 0.1 M  
316 NaHCO<sub>3</sub>) at 65°C with shaking to elute complexes. Crosslinks were reversed with by  
317 adding NaCl at a final concentration of 0.2 M as well as 50 µg/ml RNase A at 65°C  
318 overnight and the following day the samples were treated with 20 µg Proteinase K, 26.6  
319 µl of 1 M Tris-HCl pH 7.9, and 13.3 µl of 0.5 M EDTA incubated at 45°C for 1hr, and  
320 DNA was phenol/chloroform purified and precipitated. The precipitated DNA was used  
321 to generate libraries with the MicroPlex Library Preparation kit v2 (Diagenode) for ChIP-  
322 seq according to the manufacturer's instructions. The samples were then sequenced on  
323 HiSeq 4000 with read lengths of 50 bp single end, reads were mapped to the mouse  
324 mm10 genome by the software Bowtie1. Samples were normalized (see below) and  
325 peak calling was performed using the MACS2 software.

## 326 **Bioinformatics tools and data-analysis methods**

### 327 ***Normalization between ChIP-seq datasets***

328 For H2Bub1 ChIP-seq samples to correct for the bias introduced by the differences  
329 in the sequencing depth among samples, the total reads present at 3115 intergenic  
330 regions far away from genes and larger than 100 kb were selected as described  
331 previously<sup>19</sup>. These intergenic reads were used for the normalization of H2Bub1 ChIP-

332 seq samples. We calculated the size factor of these intergenic regions for each sample  
333 using DESeq2 (version 1.16)<sup>52</sup>. These size factors were used to normalize the H2Bub1  
334 ChIP-seq data.

335 For Pol II ChIP-seq and Pol II Ser2P ChIP-seq samples, the total number of  
336 mapped reads were used for normalization. Twenty million of total reads were used to  
337 generate the .bed files for the seqMINER software analysis. The .bigwig files for the  
338 Integrative Genomics Viewer (IGV) visualization were generated with makeUCSCfile  
339 program in Homer package, the total number of reads was normalized to 10 million and  
340 the fragment length was normalized to 100 bp.

#### 341 ***Calculation of density values***

342 Density values were defined as follows: density = [(number of aligned reads in a  
343 region of interest) / (length of the region of interest in bp)] / (size factor x 10<sup>-8</sup>). For  
344 H2Bub1 datasets, we considered only the gene bodies of expressed genes containing  
345 at least 1 ChIP-seq read. Out of 16269 expressed genes in mESCs, 15467 contain at  
346 least 1 ChIP-seq read. Out of 15084 expressed genes in MEF cells, 14500 contain at  
347 least 1 ChIP-seq read (Supplementary Table 4).

#### 348 ***Generation of average profiles and heat maps***

349 Average profiles and k-means clustering were generated with the seqMINER  
350 program<sup>53</sup>. The end of each aligned read was extended to 200 bp in the direction of the  
351 read. For the analyses around promoters, the tag density was extracted in a 2 kb  
352 window centred on each TSS. For average gene profiles, each gene body was divided  
353 into 160 equal bins (the absolute size depending on the gene length), 5 kb upstream  
354 and downstream were added. Moreover, 20 equally sized bins (250 bp/bin) were



355 created upstream and downstream of genes. Densities were collected for each dataset  
356 in each bin.

### 357 **Calculation of Pol II traveling ratio**

358 Pol II pausing was based on the “Pausing Index” which is also referred to as  
359 “Traveling Ratio”<sup>54, 82</sup>. We estimated the “Traveling Ratio” as the ratio of normalized Pol  
360 II ChIP-seq reads within the TSS region (–100 to +300 bps around TSS) to that in the  
361 gene body (TSS + 300 bps to TSS +2 kb), for genes expressed more than 100  
362 normalized reads to the median size of transcript in kb and > 1 kb in length. Maximal  
363 distance and Kolmogorov & Smirnov test were analysed using R (version 3.5).

364

### 365 **Code availability**

366 Data and figures were generated using R (version 3.5). All custom code is available  
367 upon request.

### 368 **Data availability**

369 All the datasets generated during the current study are available together in Gene  
370 Expression Omnibus (GEO) database under the accession number GSE153587.  
371 Individual RNA-seq data can be accessed at GSE153578 and ChIP-seq data at  
372 GSE153584.

373

## 374 **Results**

### 375 ***In vivo* loss of ATXN7L3 results in a more severe phenotype than the loss of** 376 **USP22**

377 To compare the deubiquitylation requirement for USP22 and ATXN7L3 *in vivo*, we  
378 generated *Usp22*<sup>+/-</sup> and *Atxn7l3*<sup>+/-</sup> mice (Supplementary Fig. 1A-D). As heterozygous

379 *Usp22*<sup>+/-</sup>, or *Atxn713*<sup>+/-</sup> mice were phenotypically indistinguishable from their wild type  
380 littermates (Table 1 and 2), *Usp22*<sup>+/-</sup>, or *Atxn713*<sup>+/-</sup> mice were intercrossed to obtain  
381 *Atxn713*<sup>-/-</sup> and *Usp22*<sup>-/-</sup> homozygous mutants. *Usp22*<sup>-/-</sup> embryos started to resorb at  
382 E13.5 (Fig. 1Ah) and could not be observed after E14.5, similarly to what has been  
383 previously published<sup>40, 44, 45</sup> (Table 1, Fig. 1A). Similarly, no *Atxn713*<sup>-/-</sup> pups could be  
384 retrieved at weaning (Table 2), however, analysis of *Atxn713*<sup>+/-</sup> intercross litters collected  
385 at different stages of development revealed a more severe phenotype than *Usp22*<sup>-/-</sup>  
386 mutants. A growth delay was already observed as early as E7.5 in *Atxn713*<sup>-/-</sup> embryos  
387 (Fig. 1B), which did not turn at E9.5 (Fig. 1Bf). From E10.5 onwards, two classes of  
388 phenotype were observed: a severe and a mild, corresponding to 2/3 and 1/3 of the  
389 *Atxn713*<sup>-/-</sup> embryos, respectively. No *Atxn713*<sup>-/-</sup> embryos could be retrieved after E11.5  
390 (Table 2). The mild class embryos were growth delayed (Fig. 1Bi and 1Bl) and in some  
391 instances blood pooling could be observed (Fig. 1Bh-BI). The severe class embryos  
392 were smaller, failed to turn and displayed shortened trunk, abnormal head development,  
393 blood in the heart and enlarged pericardium (Fig. 1Bh and 1Bk). Our *in vivo* data  
394 demonstrate that loss of the DUB adaptor protein ATXN7L3 has a more severe effect  
395 on embryonic development than the USP22 enzyme, in agreement with published *in*  
396 *vitro* data<sup>34</sup>.

### 397 ***Atxn713*<sup>-/-</sup> embryos show strong increase in global H2Bub1 levels**

398 To investigate the importance of USP22 and ATXN7L3 on H2Bub1  
399 deubiquitylation *in vivo*, we analysed global H2Bub1 levels from WT and *Usp22*<sup>-/-</sup>  
400 embryos at E10.5, E11.5 and E12.5 stages (Fig. 1C, and data not shown), as well as  
401 from WT and *Atxn713*<sup>-/-</sup> embryos at E9.5, or E10.5 stages (Fig. 1D). While minor  
402 changes (1.2 fold) were observed between controls and *Usp22*<sup>-/-</sup> embryos lysates (Fig.

403 1C and 1E), a 4-5-fold increase in global H2Bub1 levels were observed in *Atxn7l3*<sup>-/-</sup>  
404 embryo extracts (Fig. 1D and 1F), confirming similar observations made in human  
405 cancer cell lines<sup>32, 34</sup>. Histone H3K4 trimethylation, and H3K9 acetylation were not  
406 affected in *Usp22*<sup>-/-</sup>, or *Atxn7l3*<sup>-/-</sup> embryos (Fig. 1C and 1D). Thus, ATXN7L3 is required  
407 for the full activity of the three related DUB modules to regulate global H2Bub1 levels,  
408 whereas USP22-containing DUB module is less involved in genome-wide  
409 deubiquitylation of H2Bub1.

#### 410 ***Atxn7l3*<sup>-/-</sup> mESCs and *Atxn7l3*<sup>-/-</sup> MEF-like cells show abnormal proliferation** 411 **and phenotypes**

412 As *Usp22*<sup>-/-</sup> embryonic phenotypes have been already described<sup>40, 44</sup>, we  
413 concentrated our analyses on *Atxn7l3*<sup>-/-</sup> mutants. To determine the mechanistic outcome  
414 of perturbed DUB function(s), we derived mESCs and MEF-like cells from *Atxn7l3*<sup>-/-</sup>  
415 embryos. As in the embryos, ATXN7L3 protein levels were undetectable in these  
416 *Atxn7l3*<sup>-/-</sup> cellular systems (Supplementary Fig. 2A) and global H2Bub1 levels were  
417 significantly upregulated, by almost 4-5-fold in mESCs and about 7.5-8-fold in MEFs  
418 (Fig. 2A, 2B and Supplementary Fig. 2B).

419 Alkaline phosphatase staining and expression of pluripotency markers, such as  
420 *Pou5f1*, *Sox2*, *Klf4*, *Nanog*, *Esrrb* and *Tfcp2l1*<sup>55</sup>, were similar between *Atxn7l3*<sup>-/-</sup> and  
421 control mESCs (Fig. 2C, and Supplementary Fig. 2C), indicating that the pluripotency of  
422 these cells was not significantly affected in absence of ATXN7L3. Similarly, when  
423 apoptotic cell death and non-synchronized cell cycle phase distribution were measured,  
424 no significant differences were detected when comparing WT and *Atxn7l3*<sup>-/-</sup> mESCs  
425 (Supplementary Fig. 2D and 2E). However, we observed that *Atxn7l3*<sup>-/-</sup> mESCs colonies  
426 were more irregular (Fig. 2C) and proliferated slower (Fig. 2D) compared to WT

427 mESCs. Thus, ATXN7L3-regulated DUB activity may be necessary to facilitate efficient  
428 cell cycle progression and consequent cell proliferation, similarly to USP22 that is  
429 critical for progressing through G1 phase of the cell cycle <sup>37</sup>.

430 In *Atxn7l3*<sup>-/-</sup> MEFs, many cells had an abnormal round morphology (Fig. 2E, right  
431 panel) originating from clusters of cells that proliferated faster than elongated *Atxn7l3*<sup>+/+</sup>  
432 MEFs (Fig. 2E). The round *Atxn7l3*<sup>-/-</sup> cells were present in all MEFs generated from  
433 E10.5 *Atxn7l3*<sup>-/-</sup> embryos (n>12 embryos). The proportion of round cells relative to  
434 elongated cells appeared to correlate with the severity of the phenotype. No significant  
435 differences were detected when comparing WT and *Atxn7l3*<sup>-/-</sup> MEFs cell cycle phase  
436 distribution and apoptotic cell death (Supplementary Fig. 2F and 2G). However, *Atxn7l3*  
437 <sup>-/-</sup> MEFs from passage 2 tended to proliferate somewhat slower for the first three days  
438 compared to WT MEFs, but then started to grow faster than WT MEFs (Fig. 2F).

439 Thus, ATXN7L3-linked DUB activity loss, and the resulting increased H2Bub1  
440 levels do not result in severe phenotypic changes in *Atxn7l3*<sup>-/-</sup> mESCs, but cause  
441 profound morphological changes and proliferation alterations in *Atxn7l3*<sup>-/-</sup> MEF-like cells.

442 **Deregulation of gene expression is more severe in *Atxn7l3*<sup>-/-</sup> MEFs than in**  
443 ***Atxn7l3*<sup>-/-</sup> mESCs**

444 To further characterize ATXN7L3-dependent DUB activity, we measured changes  
445 in steady state mRNA levels between *Atxn7l3*<sup>+/+</sup> and *Atxn7l3*<sup>-/-</sup> mESCs, as well as  
446 between *Atxn7l3*<sup>+/+</sup> and *Atxn7l3*<sup>-/-</sup> MEFs by carrying out RNA-seq analyses. We first  
447 verified whether the *Atxn7l3*<sup>-/-</sup> MEF-like cells still belong to the MEF lineage in spite of  
448 their unusual morphology by comparing our MEFs RNA-seq results with 921 RNA-seq  
449 datasets from 272 distinct mouse cell types or tissues <sup>56</sup>. This analysis indicated that the  
450 *Atxn7l3*<sup>-/-</sup> MEF-like cells clustered together with *Atxn7l3*<sup>+/+</sup> MEFs or fibroblasts

451 (Supplementary Fig. 3C), suggesting that the *Atxn7l3*<sup>-/-</sup> MEF-like cells belong to the  
452 fibroblast lineage.

453 Differential gene expression analysis between *Atxn7l3*<sup>-/-</sup> and WT mESCs, or  
454 *Atxn7l3*<sup>-/-</sup> and WT MEFs, showed that in both *Atxn7l3*<sup>-/-</sup> samples there are significant  
455 numbers of genes which expression was up- or down-regulated (Fig. 3A and 3B, and  
456 Supplementary Fig. 4A and 4B). When compared to control cells, 1116 up-regulated  
457 and 810 down-regulated transcripts were identified in *Atxn7l3*<sup>-/-</sup> mESCs, while 1185 up-  
458 regulated and 1555 down-regulated transcripts were found in the *Atxn7l3*<sup>-/-</sup> MEFs (Fig.  
459 3A and 3B). These observations suggest that out of approximately 15000 Pol II  
460 transcribed genes in mESCs (16269 transcripts), or in MEFs (15089 transcripts),  
461 ATXN7L3-linked DUB function regulates the transcription of only a subset of genes. In  
462 both cellular systems, down-regulated, up-regulated and unchanged gene sets were  
463 validated using RT-qPCR (Supplementary Fig. 2C, and Supplementary Fig. 3D and 3E).  
464 The fold change in differentially expressed gene was much more pronounced in  
465 *Atxn7l3*<sup>-/-</sup> MEFs than in *Atxn7l3*<sup>-/-</sup> mESCs (Fig. 3A and 3B), as in *Atxn7l3*<sup>-/-</sup> MEFs about  
466 151 transcripts changed their expression 32-fold or more (up and down), while in  
467 *Atxn7l3*<sup>-/-</sup> mESCs only 2 genes changed their expression 32-fold (Fig. 3C). Moreover,  
468 when comparing the down- or up-regulated genes between *Atxn7l3*<sup>-/-</sup> mESCs and  
469 *Atxn7l3*<sup>-/-</sup> MEFs, only very few transcripts were similarly affected in the two cellular  
470 systems (Fig. 3D and 3E), suggesting that ATXN7L3-linked DUB activity regulates  
471 different subset of genes in the two cellular environments.

472 Gene ontology (GO) analyses of genes down-regulated in *Atxn7l3*<sup>-/-</sup> mESCs  
473 revealed enrichment of GO categories linked to regulation of transcription, as well as  
474 cell differentiation, while in the up-regulated genes the GO categories “Metabolic

475 processes”, and “Cell adhesion” were enriched (Supplementary Fig. 4C, 4D). Analyses  
476 of *Atxn7l3*<sup>-/-</sup> MEFs indicated that genes involved in “Multicellular organism development”,  
477 and “Cell adhesion” were down-regulated, while genes belonging in “Metabolic” and  
478 “Immune system” processes were up-regulated (Supplementary Fig. 4E, 4F). Thus,  
479 ATXN7L3-related DUB activities regulate different subsets of genes in the two cellular  
480 systems.

481 **Cell adhesion and extracellular matrix genes are down-regulated in *Atxn7l3*<sup>-/-</sup>**  
482 **MEFs**

483 We further investigated the expression changes observed in the “Cell adhesion”  
484 GO category, since they could account for the unusual shape of the *Atxn7l3*<sup>-/-</sup> MEFs.  
485 RNA-seq analyses indicated that a majority of genes coding for proteins belonging to  
486 this GO category: such as cadherins, catenins, collagens, and other cell adhesion  
487 molecules, were massively down-regulated in *Atxn7l3*<sup>-/-</sup> MEFs compared to control  
488 MEFs (Fig. 4A). The deregulation of several of these genes was confirmed  
489 (Supplementary Fig. 3E).

490 We next analysed actin cytoskeletal proteins by fluorescence imaging. Using  
491 phalloidin staining, labelling F-actin filaments, and anti-β-actin immunofluorescence, we  
492 observed a massively reduced abundance of F-actin filaments and β-actin in *Atxn7l3*<sup>-/-</sup>  
493 MEFs compared to WT MEFs (Fig. 4B), suggesting that loss of ATXN7L3 results in a  
494 down-regulation of cell adhesion complexes which in turn disrupt the actin cytoskeleton  
495 in MEFs.

496 **H2Bub1 levels increase in the gene bodies of *Atxn7l3*<sup>-/-</sup> mESCs and *Atxn7l3*<sup>-/-</sup>**  
497 **MEFs**

498 To evaluate the changes in the genome-wide distribution of H2Bub1 in *Atxn713*<sup>-/-</sup>  
499 mESCs, or *Atxn713*<sup>-/-</sup> MEFs versus WT controls, chromatin immunoprecipitation coupled  
500 to high throughput sequencing (ChIP-seq) was performed using an anti-H2Bub1  
501 antibody. The genomic distribution of H2Bub1 on several housekeeping genes was  
502 visualized using Integrative Genomics Viewer (IGV). H2Bub1 levels in both WT cell  
503 populations are relatively low, but highly increase in coding regions of both *Atxn713*<sup>-/-</sup>  
504 mESCs and *Atxn713*<sup>-/-</sup> MEFs, often showing a H2Bub1 enrichment peak downstream of  
505 the transcription start site (TSS) (Fig. 5A and 5B).

506 To analyze quantitatively how the loss of the ATXN7L3-linked deubiquitylation  
507 activity changes H2Bub1 levels genome-wide, the presence of H2Bub1 over coding  
508 sequences of all annotated genes was normalized to intergenic regions and calculated.  
509 These analyses indicated that in *Atxn713*<sup>-/-</sup> mESCs and in *Atxn713*<sup>-/-</sup> MEFs the levels of  
510 H2Bub1 increase significantly over the gene body regions of either all expressed genes  
511 (Fig. 5C and 5D), or non-neighbouring expressed genes (after removing overlapping  
512 gene units within a 5 kb window 5' and 3'; Supplementary Fig. 5A and 5B). In  
513 transcribed genes, we observed a 1.8-fold increase in H2Bub1 levels in *Atxn713*<sup>-/-</sup>  
514 mESCs compared to WT controls, and a 6.5-fold increase in *Atxn713*<sup>-/-</sup> MEFs (Fig. 5C  
515 and 5D, Supplementary Fig. 5C and 5D).

516 Next, metagene profiles of H2Bub1 spanning the entire transcribed regions and  
517 extending 5 kb upstream from TSSs and 5 kb downstream of the transcription end site  
518 (TES) were generated in *Atxn713*<sup>-/-</sup> versus WT mESCs or MEFs (Fig. 5E and 5F). These  
519 profiles revealed a global increase of H2Bub1 over the whole transcribed region with an  
520 important enrichment in the region downstream from the TSS in *Atxn713*<sup>-/-</sup> compared to  
521 WT mESCs (Fig. 5E). Similar results were obtained when we compared WT and

522 *Atxn713*<sup>-/-</sup> MEFs, however with a much stronger increase in H2Bub1 levels on the gene-  
523 body regions of *Atxn713*<sup>-/-</sup> MEFs than in *Atxn713*<sup>-/-</sup> mESCs (Fig. 5E and 5F). Moreover,  
524 our analyses on all expressed non-overlapping genes, up- or down-regulated in *Atxn713*<sup>-/-</sup>  
525 <sup>-/-</sup> cells (Supplementary Fig. 5E-5J) show that H2Bub1 levels increase strongly in all  
526 categories, except at genes down-regulated in *Atxn713*<sup>-/-</sup>mESCs (Supplementary Fig.  
527 5F). These results show that ATXN7L3-linked DUB activity is responsible for the  
528 genome-wide deubiquitylation over the coding regions of expressed genes in mESCs  
529 and MEFs and suggest no general link between genome-wide H2Bub1 erasure defects  
530 and Pol II transcription.

531 **Pol II occupancy does not correlate with the H2Bub1 increase in *Atxn713*<sup>-/-</sup>**  
532 **cells**

533 To test whether the strong increase in H2Bub1 over the transcribed regions  
534 observed in the *Atxn713*<sup>-/-</sup> cells would influence Pol II occupancy at promoters and/or in  
535 gene bodies, *Atxn713*<sup>-/-</sup> mESCs and MEFs as well as control cells were subjected to  
536 ChIP-seq, using an antibody recognizing the non-modified C-terminal domain (CTD) of  
537 the largest subunit of Pol II (RPB1). Data obtained from *Atxn713*<sup>-/-</sup> mESCs, and *Atxn713*<sup>-/-</sup>  
538 MEFs at selected genes (Fig. 6A and 6B), or genome-wide (k-means clustering, Fig. 6C  
539 and 6D; and meta-gene plots, Fig. 6E and 6F) indicated that Pol II occupancy did not  
540 change dramatically, compared with the corresponding WT cells. Pol II occupancy at  
541 expressed genes was almost not affected at the TSS regions and slightly decreased in  
542 the gene body regions in both *Atxn713*<sup>-/-</sup> cell types compared to WT cells (Fig. 6E-6F). In  
543 contrast, at most of Pol II occupied regions, H2Bub1 levels were highly increased in  
544 *Atxn713*<sup>-/-</sup> mESCs and MEFs, compared to control cells (Fig. 5E and 5F). Next, we tested  
545 Pol II occupancy on genes, which were either down- or up-regulated by the loss of



546 ATXN7L3-linked DUB activity (Fig. 3). Our metagene analyses on the up- and down-  
547 regulated gene categories in both *Atxn7l3*<sup>-/-</sup> cell types suggest that Pol II occupancy  
548 changes tend to correlate with the observed changes in transcript levels, but not with  
549 changes in H2Bub1 levels (Supplementary Fig. 6A, 6B, 6E and 6F). As expected, we  
550 observed a complete loss of Pol II occupancy at highly down-regulated genes, or a  
551 strong increase in Pol II occupancy at highly up-regulated genes in *Atxn7l3*<sup>-/-</sup> MEFs,  
552 compared to control cells (Supplementary Fig. 7). However, these totally opposite Pol II  
553 occupancy changes were often accompanied by a strong increase in H2Bub1 levels at  
554 these genes (Supplementary Fig. 7). These results together suggest that a strong global  
555 H2Bub1 increase in *Atxn7l3*<sup>-/-</sup> cells do not globally deregulate RNA polymerase II  
556 occupancy at transcribed genes.

#### 557 **Paused Pol II and H2Bub1 peaks downstream of the TSSs do not overlap**

558 Next, we analyzed whether promoter proximal Pol II peaks observed at transcribed  
559 genes around the +60 bp region<sup>57, 58, 59</sup>, would overlap with the H2Bub1 peak observed  
560 downstream of the TSSs both in WT and *Atxn7l3*<sup>-/-</sup> cells. As expected meta-gene  
561 analyses around the TSSs showed that in both mESCs and MEFs (WT and *Atxn7l3*<sup>-/-</sup>)  
562 Pol II peaks gave the highest signal at around the +60 region (Fig. 6G and 6H). In  
563 contrast, H2Bub1 density in WT and *Atxn7l3*<sup>-/-</sup> mESCs and *Atxn7l3*<sup>-/-</sup> MEFs is low in the  
564 +60 regions and reaches its maximum more downstream, in the +300 bp region (Fig.  
565 6G and 6H). Importantly, Pol II accumulation at the pause site was not influenced by the  
566 large increase of H2Bub1 in *Atxn7l3*<sup>-/-</sup> cells, suggesting that H2Bub1 deubiquitylation by  
567 the ATXN7L3-dependent DUB module(s) may not regulate promoter proximal pausing  
568 of Pol II, and/or Pol II turnover.

#### 569 **Pol II elongation rates are not changed by H2Bub1 increase in *Atxn7l3*<sup>-/-</sup> cells**

570 As transcription elongation-linked Ser2 phosphorylation (Ser2P) of Pol II peaks  
571 downstream of the TSS and then increases again gradually in the gene body region<sup>60</sup>,  
572 we performed anti-Pol II-Ser2P ChIP-seq in the *Atxn7l3*<sup>-/-</sup> mESCs, compared to WT  
573 cells. Our genome-wide analyses of Pol II-Ser2P occupancy on expressed genes either  
574 by k-means clustering or by metagene profiling indicated no detectable changes around  
575 the TSS regions, but a slight (1.13-fold) increase of the Pol II-Ser2P signal towards the  
576 TES and downstream of it (Fig. 7A and 7B). K-means clustering analyses distinguished  
577 genes with a strong Pol II-Ser2P signal around their TESs in WT mESCs (cluster 1, Fig.  
578 7A) and genes devoid of Pol II-Ser2P enrichment around their TESs (cluster 2, Fig. 7A).  
579 Metagene profiles of each cluster indicated that the increase of Pol II-Ser2P signal  
580 downstream of the TES in *Atxn7l3*<sup>-/-</sup> mESCs was more pronounced at genes of cluster 1  
581 than at cluster 2 (1.4-fold, Fig. 7A, 7C and 7D), suggesting potential defects in Pol II  
582 transcription, elongation rates and/or termination on genes belonging to cluster 1.

583 Thus, we determined whether Pol II elongation rates in gene bodies was altered in  
584 *Atxn7l3*<sup>-/-</sup> mESCs or MEFs, compared to WT cells. To this end we measured Pol II  
585 travelling ratios<sup>54, 61</sup>. Pol II and Pol II-Ser2P travelling ratios in *Atxn7l3*<sup>-/-</sup> mESCs, or Pol  
586 II traveling ratio in *Atxn7l3*<sup>-/-</sup> MEFs, compared to WT cells, showed only very minor  
587 changes on expressed genes (Fig. 7E-7G), suggesting that Pol II elongation rates were  
588 not significantly changed in *Atxn7l3*<sup>-/-</sup> mESCs or MEFs.

589

## 590 Discussion

591 **Loss of the DUB adaptor ATXN7L3 results in a more severe phenotype than**  
592 **the loss of the DUB enzyme of SAGA, USP22**

593 The relative abundance and function of the various DUB complexes, their  
594 redundant activities and/or compensatory mechanisms, in different cell types, at various  
595 stages of mouse embryogenesis has not been explored. Koutelou et al. (2019)<sup>44</sup>  
596 revealed that USP22 is essential for placental development. Consistent with our  
597 findings, *Usp22*<sup>-/-</sup> embryos developed normally up to E12.5, but then die around E13.5-  
598 E14.5. It has been reported that *Usp22* is expressed ubiquitously in the embryo and  
599 hippomorphic *Usp22*<sup>lacZ/lacZ</sup> mice have a reduced body size and weight<sup>45</sup>. The absence  
600 of a strong morphological phenotype in the *Usp22*<sup>-/-</sup> embryos before E13.5 suggests  
601 that many key early developmental processes do not require USP22, or that USP22  
602 function can be compensated by other USPs, such as USP27X, USP51. It is however  
603 remarkable that placental development in *Usp22*<sup>-/-</sup> embryos cannot be compensated by  
604 other USPs, suggesting a possible direct requirement of the SAGA complex in placental  
605 development.

606 On the other hand, no compensation is expected in *Atxn713*<sup>-/-</sup> embryos as the  
607 absence of ATXN7L3 is supposed to inactivate all SAGA-related DUB complexes<sup>34</sup>.  
608 Indeed, the *Atxn713*<sup>-/-</sup> phenotype is more severe than that of *Usp22*<sup>-/-</sup>, occurring as early  
609 as E7.5. Although it is not known whether the H2Bub1 deubiquitylation is linked to  
610 *Usp22*<sup>-/-</sup> or *Atxn713*<sup>-/-</sup> embryos phenotypes, it is interesting to note that there is a parallel  
611 between the severity of the phenotypes and the changes in H2Bub1 levels. E10.5  
612 *Usp22*<sup>-/-</sup> embryos are normal and their genome-wide histone H2Bub1 levels do not  
613 increase (Fig. 1C and 1E), while in contrast E10.5 *Atxn713*<sup>-/-</sup> embryos are seriously  
614 affected and their H2Bub1 levels increase 4-5-fold (Fig. 1D and 1F).

615 We observed two categories of *Atxn713*<sup>-/-</sup> mutants: i) the severely affected embryos  
616 (2/3<sup>rd</sup>) which are growth retarded, fail to turn and display shortened trunk and abnormal

617 head development; ii) the mildly affected embryos ( $1/3^{\text{rd}}$ ), which do turn and only display  
618 mild growth delay. It is conceivable that ATXN7L3 is involved in embryo patterning as  
619 for example, Nodal signalling mutant embryos, which are defective in early patterning of  
620 the primitive streak, also fail to turn<sup>62</sup>. Nevertheless, the fact that some *Atxn7l3*<sup>-/-</sup>  
621 embryos escape the severe phenotype suggest that ATXN7L3 and the corresponding  
622 DUB module(s) could be involved in a developmental checkpoint control at the time of  
623 embryo turning. Remarkably, all *Atxn7l3*<sup>-/-</sup> embryos die around E11.5, and in addition to  
624 placental defects, they exhibit cardiovascular defects, as enlarged pericardium and  
625 blood pooling in the heart are observed in the severely affected *Atxn7l3*<sup>-/-</sup> embryos.  
626 Thus, the comparison of the *Usp22*<sup>-/-</sup> and *Atxn7l3*<sup>-/-</sup> embryo phenotypes suggest that the  
627 defects observed in *Usp22*<sup>-/-</sup> embryos could be compensated until E13.5 in the absence  
628 of USP22 by the activity of USP27X- and/or USP51-containing DUBs, which would  
629 require ATXN7L3 and ENY2 cofactors. Such compensation would not happen in  
630 *Atxn7l3*<sup>-/-</sup> embryo, as in the absence of ATXN7L3 all three related DUBs would be  
631 inactive.

632 The comparisons of *Atxn7l3* regulated genes (RNA-seq from our study) with  
633 SAGA-bound genes (anti-TAF6L ChIP-seq;<sup>63</sup>) in mESCs suggest that only a minority (<  
634 8%) of SAGA-bound genes are regulated (up or down) by the loss of ATXN7L3-linked  
635 DUBs. This further suggests that the USP27x- and/or USP51-containing DUBs may  
636 have also SAGA-independent gene regulatory functions.

637 In conclusion, our results showing that *Usp22*<sup>-/-</sup> embryo phenotypes are less  
638 severe agree with the biochemical findings suggesting that in *Usp22*<sup>-/-</sup> cells the activity  
639 of only one of the three related DUB modules is eliminated. In contrast, in the *Atxn7l3*<sup>-/-</sup>  
640 embryos the activities of all three related DUB modules are eliminated, thus, causing a

641 more severe phenotype. It is also possible that ATXN7L3 loss may influence the  
642 epithelial-mesenchymal transition during gastrulation. The fact that *Atxn7l3*<sup>-/-</sup> embryos  
643 survive until E11.5, suggests that none of these three related DUBs would play an  
644 essential role before this embryonic stage, and that also H2Bub1 deubiquitylation is not  
645 essential for Pol II transcription before this developmental stage.

### 646 **Histone H2Bub1 deubiquitylation is not linked to global RNA polymerase II** 647 **transcription**

648 Although H2B monoubiquitylation has been linked to increased transcription,  
649 transcription elongation, DNA replication, mitosis, and meiosis<sup>64</sup>, how this histone  
650 modification and the erasing of this mark function is not well understood. In  
651 *Saccharomyces cerevisiae* H2B mutant, K123R (which cannot be ubiquitylated) the  
652 expression of only a low number of genes (about 300-500) is affected<sup>65</sup>, suggesting  
653 that ubiquitylation and deubiquitylation may not have global transcriptional regulatory  
654 functions in yeast. Nevertheless, it has been suggested that H2Bub1 stimulates FACT-  
655 mediated displacement of a H2A/H2B dimer which in turn would facilitate the passage  
656 of Pol II through the nucleosome<sup>16</sup> and that H2Bub1 would be required for efficient  
657 reassembly of nucleosomes behind the elongating Pol II<sup>66,67</sup>. Contrary, it was reported  
658 that the effect of H2Bub1 on nucleosome stability is relatively modest<sup>68</sup>.

659 If H2Bub1 deposition (by RNF20/RNF40), or H2Bub1 erasure (by the ATXN7L3-  
660 containing DUB modules) would carry out opposite genome-wide actions, their gene  
661 regulatory actions would result in mirroring effects. However, when comparing RNA-seq  
662 data from *Rnf40* knock-out MEFs<sup>12</sup> with our RNA-seq obtained from *Atxn7l3*<sup>-/-</sup> MEFs,  
663 we did not observe any anti-correlation between the regulated genes in these two  
664 datasets (the Pearson correlation coefficient is -0.042, Supplementary Fig. 8),

665 suggesting that the H2Bub1 deposition and erasure are not (only) carrying out opposite  
666 functions on the transcribed genome.

667 Contrary to H2B monoubiquitylation, it is much less well understood whether  
668 H2Bub1 deubiquitylation would be a process significantly impacting Pol II transcription.  
669 Previously, by using an *ATXN7L3* knock-down strategy in HeLa cells we showed that  
670 the *ATXN7L3*-related DUB activities are directed toward the transcribed region of  
671 almost all expressed genes, but correlated only poorly with gene expression<sup>19</sup>. Our  
672 present results indicate that impairment of H2Bub1 deubiquitylation does not directly  
673 impact transcription initiation and/or elongation, because while we observe a massive  
674 H2Bub1 retention at almost every expressed gene in both *Atxn7l3*<sup>-/-</sup> mESCs and  
675 *Atxn7l3*<sup>-/-</sup> MEFs, Pol II and Pol II-Ser2P occupancy were only slightly impacted and only  
676 limited subsets of genes changed expression in both cellular systems (Fig. 3, 5-7). In  
677 addition, when comparing nascent and steady state mRNA changes of selected  
678 transcripts (Supplementary Figure 3 D) in WT ESCs and *Atxn7l3*<sup>-/-</sup> ESCs, we did not  
679 observe any significant differences (data not shown). Moreover, in both cellular systems  
680 the lack of correlation between global H2Bub1 increase and consequent inhibition of  
681 global transcription suggests that H2Bub1 deubiquitylation does not directly regulate Pol  
682 II transcription. In agreement, the H3K4me3 chromatin mark present at the TSSs of  
683 active genes in eukaryotes, did not change in *Usp22*<sup>-/-</sup> or in *Atxn7l3*<sup>-/-</sup> embryos, in spite  
684 of the fact that in *Atxn7l3*<sup>-/-</sup> embryos the H2Bub1 levels were increased by 4-5-fold (Fig.  
685 1C and 1D). Similarly, global H3K9ac levels do not change in *Usp22*<sup>-/-</sup> or in *Atxn7l3*<sup>-/-</sup>  
686 embryos (Fig. 1C and 1D). Thus, our study corroborates other recent studies  
687 demonstrating catalytic-independent functions of chromatin modifying complexes in  
688 mouse ES cells<sup>69, 70, 71</sup>.

689 Our results also suggest that the dynamic erasure of the H2Bub1 mark does not  
690 seem to influence global Pol II recruitment, pre-initiation complex formation at  
691 promoters, promoter proximal pausing or Pol II elongation rates (Fig. 6G, 6H and Fig.  
692 7E-7G). However, Ser2 phosphorylation of Pol II in cluster 1 downstream of the TES  
693 regions in *Atxn7l3*<sup>-/-</sup> ESCs was more pronounced, compared to WT cells (about 1.4-fold,  
694 Fig. 7A-7C), suggesting a possible compensatory «sensing» mechanism by the kinases  
695 regulating Pol II transcription elongation.

696 Whether the observed embryo and cellular phenotypes in the *Atxn7l3*<sup>-/-</sup> embryos  
697 can be directly linked to increased H2Bub1 levels in specific transcribed regions, and/or  
698 to deubiquitylation failures of other ubiquitylated protein targets, will need to be further  
699 investigated in future.

700

## 701 **Acknowledgements**

702 We thank all members of the Tora lab for protocols, thoughtful discussions and  
703 suggestions, especially V. Hisler for help with mice dissection, JC. Andrau for advice on  
704 Ser2P ChIP-seq, C. Hérouard and M. Jung from the GenomEast platform [France  
705 Génomique consortium (ANR-10-INBS-0009)], for library preparation, sequencing and  
706 analyses; C. Ebel and M. Philipps for help with FACS, the IGBMC histology platform,  
707 the IGBMC cell culture facility and S. Falcone, M. Poirot and F. Memedov of the IGBMC  
708 animal facility for animal care taking. This study was supported by grants from  
709 European Research Council (ERC) (ERC-2013-Advanced grant 340551, Birtoaction),  
710 Agence Nationale de la Recherche (ANR) PICen-19-CE11-0003-02 and EpiCAST-19-  
711 CE12-0029-01 grants, NIH 1R01GM131626-01 grant (to LT) and ANR-18-CE12-0026  
712 grant (to DD), by IGBMC International PhD program LABEX fellowship (to FW); and by

713 the IdEx-University of Strasbourg PhD program and by the 'Fondation pour la  
714 Recherche Médicale' (FRM) association (FDT201904008368) (to VF), and an ANR-10-  
715 LABX-0030-INRT grant, under the frame program Investissements d'Avenir ANR-10-  
716 IDEX-0002-02.

717



718 **References**

- 719 1. Festuccia N, Gonzalez I, Navarro P. The Epigenetic Paradox of Pluripotent ES  
720 Cells. *J Mol Biol* 2017, **429**(10): 1476-1503.  
721
- 722 2. Osley MA. Regulation of histone H2A and H2B ubiquitylation. *Brief Funct*  
723 *Genomic Proteomic* 2006, **5**(3): 179-189.  
724
- 725 3. Zhu B, Zheng Y, Pham AD, Mandal SS, Erdjument-Bromage H, Tempst P, *et al.*  
726 Monoubiquitination of human histone H2B: the factors involved and their roles in  
727 HOX gene regulation. *Mol Cell* 2005, **20**(4): 601-611.  
728
- 729 4. Shiloh Y, Shema E, Moyal L, Oren M. RNF20-RNF40: A ubiquitin-driven link  
730 between gene expression and the DNA damage response. *FEBS Lett* 2011,  
731 **585**(18): 2795-2802.  
732
- 733 5. Fierz B, Chatterjee C, McGinty RK, Bar-Dagan M, Raleigh DP, Muir TW. Histone  
734 H2B ubiquitylation disrupts local and higher-order chromatin compaction. *Nat*  
735 *Chem Biol* 2011, **7**(2): 113-119.  
736
- 737 6. Minsky N, Shema E, Field Y, Schuster M, Segal E, Oren M. Monoubiquitinated  
738 H2B is associated with the transcribed region of highly expressed genes in  
739 human cells. *Nat Cell Biol* 2008, **10**(4): 483-488.  
740
- 741 7. Shema E, Tirosh I, Aylon Y, Huang J, Ye C, Moskovits N, *et al.* The histone H2B-  
742 specific ubiquitin ligase RNF20/hBRE1 acts as a putative tumor suppressor  
743 through selective regulation of gene expression. *Genes Dev* 2008, **22**(19): 2664-  
744 2676.  
745
- 746 8. Trujillo KM, Osley MA. A role for H2B ubiquitylation in DNA replication. *Mol Cell*  
747 2012, **48**(5): 734-746.  
748
- 749 9. Kari V, Shchebet A, Neumann H, Johnsen SA. The H2B ubiquitin ligase RNF40  
750 cooperates with SUPT16H to induce dynamic changes in chromatin structure  
751 during DNA double-strand break repair. *Cell Cycle* 2011, **10**(20): 3495-3504.  
752
- 753 10. Moyal L, Lerenthal Y, Gana-Weisz M, Mass G, So S, Wang SY, *et al.*  
754 Requirement of ATM-dependent monoubiquitylation of histone H2B for timely  
755 repair of DNA double-strand breaks. *Mol Cell* 2011, **41**(5): 529-542.  
756
- 757 11. Nakamura K, Kato A, Kobayashi J, Yanagihara H, Sakamoto S, Oliveira DV, *et*  
758 *al.* Regulation of homologous recombination by RNF20-dependent H2B  
759 ubiquitination. *Mol Cell* 2011, **41**(5): 515-528.  
760
- 761 12. Xie W, Nagarajan S, Baumgart SJ, Kosinsky RL, Najafova Z, Kari V, *et al.*  
762 RNF40 regulates gene expression in an epigenetic context-dependent manner.  
763 *Genome Biol* 2017, **18**(1): 32.

- 764  
765 13. Vitaliano-Prunier A, Babour A, Herissant L, Apponi L, Margaritis T, Holstege FC,  
766 *et al.* H2B ubiquitylation controls the formation of export-competent mRNP. *Mol*  
767 *Cell* 2012, **45**(1): 132-139.  
768  
769 14. Pirngruber J, Shchebet A, Schreiber L, Shema E, Minsky N, Chapman RD, *et al.*  
770 CDK9 directs H2B monoubiquitination and controls replication-dependent histone  
771 mRNA 3'-end processing. *EMBO Rep* 2009, **10**(8): 894-900.  
772  
773 15. Evangelista FM, Maglott-Roth A, Stierle M, Brino L, Soutoglou E, Tora L.  
774 Transcription and mRNA export machineries SAGA and TREX-2 maintain  
775 monoubiquitinated H2B balance required for DNA repair. *J Cell Biol* 2018,  
776 **217**(10): 3382-3397.  
777  
778 16. Pavri R, Zhu B, Li G, Trojer P, Mandal S, Shilatifard A, *et al.* Histone H2B  
779 monoubiquitination functions cooperatively with FACT to regulate elongation by  
780 RNA polymerase II. *Cell* 2006, **125**(4): 703-717.  
781  
782 17. Chandrasekharan MB, Huang F, Sun ZW. Histone H2B ubiquitination and  
783 beyond: Regulation of nucleosome stability, chromatin dynamics and the trans-  
784 histone H3 methylation. *Epigenetics* 2010, **5**(6): 460-468.  
785  
786 18. Bonnet J, Devys D, Tora L. Histone H2B ubiquitination: signaling not scrapping.  
787 *Drug Discov Today Technol* 2014, **12**: e19-27.  
788  
789 19. Bonnet J, Wang CY, Baptista T, Vincent SD, Hsiao WC, Stierle M, *et al.* The  
790 SAGA coactivator complex acts on the whole transcribed genome and is required  
791 for RNA polymerase II transcription. *Gene Dev* 2014, **28**(18): 1999-2012.  
792  
793 20. Fuchs G, Hollander D, Voichek Y, Ast G, Oren M. Cotranscriptional histone H2B  
794 monoubiquitylation is tightly coupled with RNA polymerase II elongation rate.  
795 *Genome research* 2014, **24**(10): 1572-1583.  
796  
797 21. Jung I, Kim SK, Kim M, Han YM, Kim YS, Kim D, *et al.* H2B monoubiquitylation is  
798 a 5'-enriched active transcription mark and correlates with exon-intron structure  
799 in human cells. *Genome Res* 2012, **22**(6): 1026-1035.  
800  
801 22. Briggs SD, Xiao T, Sun ZW, Caldwell JA, Shabanowitz J, Hunt DF, *et al.* Gene  
802 silencing: trans-histone regulatory pathway in chromatin. *Nature* 2002,  
803 **418**(6897): 498.  
804  
805 23. Dover J, Schneider J, Tawiah-Boateng MA, Wood A, Dean K, Johnston M, *et al.*  
806 Methylation of histone H3 by COMPASS requires ubiquitination of histone H2B  
807 by Rad6. *J Biol Chem* 2002, **277**(32): 28368-28371.  
808

- 809 24. Ng HH, Xu RM, Zhang Y, Struhl K. Ubiquitination of histone H2B by Rad6 is  
810 required for efficient Dot1-mediated methylation of histone H3 lysine 79. *J Biol*  
811 *Chem* 2002, **277**(38): 34655-34657.  
812
- 813 25. Sun ZW, Allis CD. Ubiquitination of histone H2B regulates H3 methylation and  
814 gene silencing in yeast. *Nature* 2002, **418**(6893): 104-108.  
815
- 816 26. Lee JS, Shukla A, Schneider J, Swanson SK, Washburn MP, Florens L, *et al.*  
817 Histone crosstalk between H2B monoubiquitination and H3 methylation mediated  
818 by COMPASS. *Cell* 2007, **131**(6): 1084-1096.  
819
- 820 27. Kim J, Kim JA, McGinty RK, Nguyen UT, Muir TW, Allis CD, *et al.* The n-SET  
821 domain of Set1 regulates H2B ubiquitylation-dependent H3K4 methylation. *Mol*  
822 *Cell* 2013, **49**(6): 1121-1133.  
823
- 824 28. Daniel JA, Torok MS, Sun ZW, Schieltz D, Allis CD, Yates JR, 3rd, *et al.*  
825 Deubiquitination of histone H2B by a yeast acetyltransferase complex regulates  
826 transcription. *J Biol Chem* 2004, **279**(3): 1867-1871.  
827
- 828 29. Henry KW, Wyce A, Lo WS, Duggan LJ, Emre NC, Kao CF, *et al.* Transcriptional  
829 activation via sequential histone H2B ubiquitylation and deubiquitylation,  
830 mediated by SAGA-associated Ubp8. *Genes Dev* 2003, **17**(21): 2648-2663.  
831
- 832 30. Zhao Y, Lang G, Ito S, Bonnet J, Metzger E, Sawatsubashi S, *et al.* A  
833 TFTC/STAGA module mediates histone H2A and H2B deubiquitination,  
834 coactivates nuclear receptors, and counteracts heterochromatin silencing. *Mol*  
835 *Cell* 2008, **29**(1): 92-101.  
836
- 837 31. Zhang XY, Varthi M, Sykes SM, Phillips C, Warzecha C, Zhu W, *et al.* The  
838 putative cancer stem cell marker USP22 is a subunit of the human SAGA  
839 complex required for activated transcription and cell-cycle progression. *Mol Cell*  
840 2008, **29**(1): 102-111.  
841
- 842 32. Lang G, Bonnet J, Umlauf D, Karmodiya K, Koffler J, Stierle M, *et al.* The tightly  
843 controlled deubiquitination activity of the human SAGA complex differentially  
844 modifies distinct gene regulatory elements. *Molecular and cellular biology* 2011,  
845 **31**(18): 3734-3744.  
846
- 847 33. Morgan MT, Wolberger C. Recognition of ubiquitinated nucleosomes. *Curr Opin*  
848 *Struct Biol* 2017, **42**: 75-82.  
849
- 850 34. Atanassov BS, Mohan RD, Lan X, Kuang X, Lu Y, Lin K, *et al.* ATXN7L3 and  
851 ENY2 Coordinate Activity of Multiple H2B Deubiquitinases Important for Cellular  
852 Proliferation and Tumor Growth. *Mol Cell* 2016, **62**(4): 558-571.  
853
- 854 35. Bonnet J, Romier C, Tora L, Devys D. Zinc-finger UBPs: regulators of  
855 deubiquitylation. *Trends Biochem Sci* 2008, **33**(8): 369-375.

- 856  
857 36. Atanassov BS, Evrard YA, Multani AS, Zhang Z, Tora L, Devys D, *et al.* Gcn5  
858 and SAGA regulate shelterin protein turnover and telomere maintenance. *Mol*  
859 *Cell* 2009, **35**(3): 352-364.  
860  
861 37. Gennaro VJ, Stanek TJ, Peck AR, Sun Y, Wang F, Qie S, *et al.* Control of  
862 CCND1 ubiquitylation by the catalytic SAGA subunit USP22 is essential for cell  
863 cycle progression through G1 in cancer cells. *Proc Natl Acad Sci U S A* 2018,  
864 **115**(40): E9298-E9307.  
865  
866 38. Atanassov BS, Dent SY. USP22 regulates cell proliferation by deubiquitinating  
867 the transcriptional regulator FBP1. *EMBO Rep* 2011, **12**(9): 924-930.  
868  
869 39. Armour SM, Bennett EJ, Braun CR, Zhang XY, McMahon SB, Gygi SP, *et al.* A  
870 high-confidence interaction map identifies SIRT1 as a mediator of acetylation of  
871 USP22 and the SAGA coactivator complex. *Mol Cell Biol* 2013, **33**(8): 1487-  
872 1502.  
873  
874 40. Lin Z, Yang H, Kong Q, Li J, Lee SM, Gao B, *et al.* USP22 antagonizes p53  
875 transcriptional activation by deubiquitinating Sirt1 to suppress cell apoptosis and  
876 is required for mouse embryonic development. *Mol Cell* 2012, **46**(4): 484-494.  
877  
878 41. Kobayashi T, Iwamoto Y, Takashima K, Isomura A, Kosodo Y, Kawakami K, *et*  
879 *al.* Deubiquitinating enzymes regulate Hes1 stability and neuronal differentiation.  
880 *FEBS J* 2015, **282**(13): 2411-2423.  
881  
882 42. Lambies G, Miceli M, Martinez-Guillamon C, Olivera-Salguero R, Pena R, Frias  
883 CP, *et al.* TGFbeta-Activated USP27X Deubiquitinase Regulates Cell Migration  
884 and Chemoresistance via Stabilization of Snail1. *Cancer Res* 2019, **79**(1): 33-46.  
885  
886 43. Zhou Z, Zhang P, Hu X, Kim J, Yao F, Xiao Z, *et al.* USP51 promotes  
887 deubiquitination and stabilization of ZEB1. *Am J Cancer Res* 2017, **7**(10): 2020-  
888 2031.  
889  
890 44. Koutelou E, Wang L, Schibler AC, Chao HP, Kuang X, Lin K, *et al.* USP22  
891 controls multiple signaling pathways that are essential for vasculature formation  
892 in the mouse placenta. *Development* 2019, **146**(4).  
893  
894 45. Kosinsky RL, Wegwitz F, Hellbach N, Dobbstein M, Mansouri A, Vogel T, *et al.*  
895 Usp22 deficiency impairs intestinal epithelial lineage specification in vivo.  
896 *Oncotarget* 2015, **6**(35): 37906-37918.  
897  
898 46. Tyanova S, Temu T, Sinitcyn P, Carlson A, Hein MY, Geiger T, *et al.* The  
899 Perseus computational platform for comprehensive analysis of (prote)omics data.  
900 *Nat Methods* 2016, **13**(9): 731-740.  
901

- 902 47. Dobin A, Davis CA, Schlesinger F, Drenkow J, Zaleski C, Jha S, *et al.* STAR:  
903 ultrafast universal RNA-seq aligner. *Bioinformatics* 2013, **29**(1): 15-21.  
904
- 905 48. Love MI, Huber W, Anders S. Moderated estimation of fold change and  
906 dispersion for RNA-seq data with DESeq2. *Genome Biol* 2014, **15**(12): 550.  
907
- 908 49. El-Saafin F, Curry C, Ye T, Garnier JM, Kolb-Cheynel I, Stierle M, *et al.*  
909 Homozygous TAF8 mutation in a patient with intellectual disability results in  
910 undetectable TAF8 protein, but preserved RNA polymerase II transcription. *Hum*  
911 *Mol Genet* 2018, **27**(12): 2171-2186.  
912
- 913 50. Gyenis A, Umlauf D, Ujfaludi Z, Boros I, Ye T, Tora L. UVB induces a genome-  
914 wide acting negative regulatory mechanism that operates at the level of  
915 transcription initiation in human cells. *PLoS genetics* 2014, **10**(7): e1004483.  
916
- 917 51. Chapman RD, Heidemann M, Albert TK, Mailhammer R, Flatley A, Meisterernst  
918 M, *et al.* Transcribing RNA polymerase II is phosphorylated at CTD residue  
919 serine-7. *Science* 2007, **318**(5857): 1780-1782.  
920
- 921 52. Anders S, Huber W. Differential expression analysis for sequence count data.  
922 *Genome Biol* 2010, **11**(10): R106.  
923
- 924 53. Ye T, Krebs AR, Choukrallah MA, Keime C, Plewniak F, Davidson I, *et al.*  
925 seqMINER: an integrated CHIP-seq data interpretation platform. *Nucleic acids*  
926 *research* 2011, **39**(6): e35.  
927
- 928 54. Rahl PB, Lin CY, Seila AC, Flynn RA, McCuine S, Burge CB, *et al.* c-Myc  
929 regulates transcriptional pause release. *Cell* 2010, **141**(3): 432-445.  
930
- 931 55. Martello G, Smith A. The nature of embryonic stem cells. *Annu Rev Cell Dev Biol*  
932 2014, **30**: 647-675.  
933
- 934 56. Hutchins AP, Yang Z, Li Y, He F, Fu X, Wang X, *et al.* Models of global gene  
935 expression define major domains of cell type and tissue identity. *Nucleic Acids*  
936 *Res* 2017, **45**(5): 2354-2367.  
937
- 938 57. Adelman K, Lis JT. Promoter-proximal pausing of RNA polymerase II: emerging  
939 roles in metazoans. *Nature reviews Genetics* 2012, **13**(10): 720-731.  
940
- 941 58. Krebs AR, Imanci D, Hoerner L, Gaidatzis D, Burger L, Schubeler D. Genome-  
942 wide Single-Molecule Footprinting Reveals High RNA Polymerase II Turnover at  
943 Paused Promoters. *Mol Cell* 2017, **67**(3): 411-422 e414.  
944
- 945 59. Erickson B, Sheridan RM, Cortazar M, Bentley DL. Dynamic turnover of paused  
946 Pol II complexes at human promoters. *Genes Dev* 2018, **32**(17-18): 1215-1225.  
947

- 948 60. Harlen KM, Churchman LS. The code and beyond: transcription regulation by the  
949 RNA polymerase II carboxy-terminal domain. *Nat Rev Mol Cell Biol* 2017, **18**(4):  
950 263-273.  
951
- 952 61. Chen FX, Woodfin AR, Gardini A, Rickels RA, Marshall SA, Smith ER, *et al.*  
953 PAF1, a Molecular Regulator of Promoter-Proximal Pausing by RNA Polymerase  
954 II. *Cell* 2015, **162**(5): 1003-1015.  
955
- 956 62. Vincent SD, Dunn NR, Hayashi S, Norris DP, Robertson EJ. Cell fate decisions  
957 within the mouse organizer are governed by graded Nodal signals. *Genes Dev*  
958 2003, **17**(13): 1646-1662.  
959
- 960 63. Seruggia D, Oti M, Tripathi P, Canver MC, LeBlanc L, Di Giammartino DC, *et al.*  
961 TAF5L and TAF6L Maintain Self-Renewal of Embryonic Stem Cells via the MYC  
962 Regulatory Network. *Mol Cell* 2019, **74**(6): 1148-1163 e1147.  
963
- 964 64. Laribee RN, Fuchs SM, Strahl BD. H2B ubiquitylation in transcriptional control: a  
965 FACT-finding mission. *Genes Dev* 2007, **21**(7): 737-743.  
966
- 967 65. Baptista T, Devys D. *Saccharomyces cerevisiae* Metabolic Labeling with 4-  
968 thiouracil and the Quantification of Newly Synthesized mRNA As a Proxy for  
969 RNA Polymerase II Activity. *J Vis Exp* 2018(140).  
970
- 971 66. Fleming AB, Kao CF, Hillyer C, Pikaart M, Osley MA. H2B ubiquitylation plays a  
972 role in nucleosome dynamics during transcription elongation. *Mol Cell* 2008,  
973 **31**(1): 57-66.  
974
- 975 67. Batta K, Zhang Z, Yen K, Goffman DB, Pugh BF. Genome-wide function of H2B  
976 ubiquitylation in promoter and genic regions. *Genes Dev* 2011, **25**(21): 2254-  
977 2265.  
978
- 979 68. Fierz B, Kilic S, Hieb AR, Luger K, Muir TW. Stability of nucleosomes containing  
980 homogenously ubiquitylated H2A and H2B prepared using semisynthesis. *J Am*  
981 *Chem Soc* 2012, **134**(48): 19548-19551.  
982
- 983 69. Acharya D, Hainer SJ, Yoon Y, Wang F, Bach I, Rivera-Perez JA, *et al.* KAT-  
984 Independent Gene Regulation by Tip60 Promotes ESC Self-Renewal but Not  
985 Pluripotency. *Cell Rep* 2017, **19**(4): 671-679.  
986
- 987 70. Dorigi KM, Swigut T, Henriques T, Bhanu NV, Scruggs BS, Nady N, *et al.* Mll3  
988 and Mll4 Facilitate Enhancer RNA Synthesis and Transcription from Promoters  
989 Independently of H3K4 Monomethylation. *Mol Cell* 2017, **66**(4): 568-576 e564.  
990
- 991 71. Rickels R, Herz HM, Sze CC, Cao K, Morgan MA, Collings CK, *et al.* Histone  
992 H3K4 monomethylation catalyzed by Trr and mammalian COMPASS-like  
993 proteins at enhancers is dispensable for development and viability. *Nat Genet*  
994 2017, **49**(11): 1647-1653.

995  
996  
997

## Figure legends

998 **Fig. 1: Loss of the SAGA DUB adaptor ATXN7L3 results in a more severe**  
999 **phenotype than loss of the DUB enzyme USP22.**

1000 **A.** Comparison of *Usp22*<sup>+/+</sup> and *Usp22*<sup>-/-</sup> littermates from E9.5 to E14.5. **B.**  
1001 Comparison of *Atxn7l3*<sup>+/+</sup> and *Atxn7l3*<sup>-/-</sup> littermates from E7.5 to E11.5. From E10.5  
1002 onwards, the *Atxn7l3*<sup>-/-</sup> embryos can be categorized in 2 phenotypic classes; severe (h,  
1003 k) and mild (i, l). **C-D.** Western blot analyses of E10.5 and E11.5 *Usp22*<sup>+/+</sup> and *Usp22*<sup>-/-</sup>  
1004 (C), as well as E9.5 and E10.5 *Atxn7l3*<sup>+/+</sup> and *Atxn7l3*<sup>-/-</sup> (D) whole embryo lysates using  
1005 anti-H2Bub1, anti-H3K4me3 and anti-H4 (C) or anti-H2Bub1, anti-H3K4me3 and anti-  
1006 H3 (D) antibodies. A Ponceau staining view is displayed at the bottom of each panel. M:  
1007 molecular weight marker (in kDa). The dotted line in (D) indicates where the blot was  
1008 cut. Each lane represents a biological replicate. **E-F.** Western blot analyses shown in  
1009 (C-D) were scanned and analysed densitometrically with ImageJ and the Ponceau  
1010 normalized results are represented for each genotype.

1011 **Fig. 2: Primary *Atxn7l3*<sup>-/-</sup> mESCs and *Atxn7l3*<sup>-/-</sup> MEF-like cells show strong**  
1012 **increase in H2Bub1 levels, abnormal proliferation and phenotypes.**

1013 **A.** Western blot analysis of H2Bub1 levels in acidic histone extracts obtained from  
1014 *Atxn7l3*<sup>+/+</sup> or *Atxn7l3*<sup>-/-</sup> mESC clones and *Atxn7l3*<sup>+/+</sup> or *Atxn7l3*<sup>-/-</sup> MEFs. Histone H3  
1015 western blot and ponceau stained membranes are shown as loading controls. Each  
1016 lane represents a biological replicate. **B.** Quantification of H2Bub1 levels from (A) by  
1017 using ImageJ. The y axis represents the fold change compared with WT cells. Histone  
1018 H2Bub1 quantification was carried out with H3 normalization. Error bars indicate mean  
1019  $\pm$ SD based on two biological replicates (represented by grey dots). **C.** *Atxn7l3*<sup>+/+</sup> or

1020 *Atxn7l3*<sup>-/-</sup> mESCs (3 biological replicates for each genotype) cultured in serum/LIF plus  
1021 2i medium for 6 days were either observed by phase contrast microscopy (left panels)  
1022 or visualized by alkaline phosphatase staining (right panels). Scale bar, 200  $\mu$ m. **D.**  
1023 *Atxn7l3*<sup>+/+</sup> or *Atxn7l3*<sup>-/-</sup> mESCs cell proliferation was determined by cell counting at the  
1024 indicated time points (2 biological and 3 technical replicates for each genotype). Error  
1025 bars indicate mean  $\pm$ SD based on two biological samples with three technical replicates  
1026 for each. Statistical significance was calculated using two-sided Wilcoxon rank sum test  
1027 with continuity correction (ns,  $p > 0.05$ ; \*,  $p \leq 0.05$ ; \*\*,  $p \leq 0.01$ ; \*\*\*,  $p \leq 0.001$ ). **E.**  
1028 Morphology of *Atxn7l3*<sup>+/+</sup> and *Atxn7l3*<sup>-/-</sup> MEFs derived from E10.5 embryos. Scale bar,  
1029 200  $\mu$ m (> 12 biological replicates). **F.** MEF cell number was determined by cell  
1030 counting at the indicated time points (2 biological and 3 technical replicates for each  
1031 genotype). Error bars indicate mean  $\pm$ SD based on two biological samples with three  
1032 technical replicates for each. Statistical significance was calculated using two-sided  
1033 Wilcoxon rank sum test with continuity correction (ns,  $p > 0.05$ ; \*,  $p \leq 0.05$ ; \*\*,  $p \leq 0.01$ ;  
1034 \*\*\*,  $p \leq 0.001$ ).

1035 **Fig. 3: *Atxn7l3*<sup>-/-</sup> mESCs and MEF-like cells show significant deregulation of**  
1036 **transcription**

1037 **A-B.** MA-plots of RNA-seq data carried out on poly(A)<sup>+</sup> RNA isolated from  
1038 *Atxn7l3*<sup>+/+</sup> and *Atxn7l3*<sup>-/-</sup> mESCs (A, 2 and 3 biological replicates, respectively), or from  
1039 *Atxn7l3*<sup>+/+</sup> and *Atxn7l3*<sup>-/-</sup> MEFs (B, 3 biological replicates, each). Log<sub>2</sub> fold changes are  
1040 shown versus Log<sub>2</sub> mean expression signal. Differentially expressed genes were  
1041 selected using the following thresholds: adjusted  $p$ -value  $\leq 0.05$ , absolute value of Log<sub>2</sub>  
1042 fold change  $\geq 1$  and base median expression over 10 normalized reads to the median  
1043 size of transcript in kb. Orange dots indicate up-regulated genes and blue dots indicates



1044 down-regulated genes. **C.** The number of significantly affected genes for *Atxn7l3*<sup>-/-</sup>  
1045 (KO)/*Atxn7l3*<sup>+/+</sup> (WT) are represented for either mESCs or MEFs: adjusted *p*-value ≤  
1046 0.05 and absolute value of fold change ≥ 2, 4, 8, 32, 64, 128, 256, separately. **D-E.**  
1047 Venn diagrams indicate the overlap of down-regulated (**D**) and up-regulated (**E**) genes  
1048 between mESCs and MEFs.

1049 **Fig. 4: Cell adhesion genes are down-regulated in *Atxn7l3*<sup>-/-</sup> MEFs**

1050 **A.** Heat map showing transcript levels belonging to the cell adhesion GO category  
1051 from the three biological replicates of *Atxn7l3*<sup>+/+</sup> and *Atxn7l3*<sup>-/-</sup> MEFs for transcripts that  
1052 are differentially expressed. Log<sub>2</sub> of normalized expression is shown on the vertical  
1053 column on the left. **B.** DAPI and immunofluorescence (IF) images of *Atxn7l3*<sup>+/+</sup> and  
1054 *Atxn7l3*<sup>-/-</sup> MEFs stained with anti-β-actin antibody (left) and phalloidin (right) in MEF  
1055 cells (n=1). The merge of DAPI and IF images is also shown. Scale bar: 100 μm.

1056 **Fig. 5: Histone H2Bub1 levels increase strongly in the gene bodies of both**  
1057 ***Atxn7l3*<sup>-/-</sup> mESCs and *Atxn7l3*<sup>-/-</sup> MEFs**

1058 **A-B.** IGV genomic snapshots of H2Bub1 binding profiles (n=1) at three selected  
1059 genes (*Pgk1*, *Klhl11* and *Acly*). Direction of the transcription is indicated by arrows.  
1060 Group scaled tag densities on each gene either in mESCs, or in MEFs, are indicated on  
1061 the left. **C-D.** Boxplots showing the Log<sub>10</sub>(H2Bub1 density) on the gene bodies of  
1062 expressed transcripts or intergenic regions. Two-sided Wilcoxon rank sum test with  
1063 continuity correction (\*\*\*: *p*-value < 2.2e-16). **E-F.** Average metagene profiles showing  
1064 H2Bub1 distribution on the bodies of expressed genes. 16269 expressed genes in  
1065 mESCs (E) and 15084 expressed genes in MEFs cells (F) were chosen. TSS:  
1066 transcription start site. TES: transcription end site. -5 kb region upstream of the TSS

1067 and +5 kb region downstream of the TES were also included in the average profile  
1068 analyses.

1069 **Fig. 6: The modest genome-wide Pol II occupancy changes do not correlate**  
1070 **with the strong H2Bub1 increases observed in the *Atxn713*<sup>-/-</sup> mESCs or MEFs**

1071 **A-B.** IGV genomic snapshots of H2Bub1 and Pol II binding profiles (n=1) at four  
1072 selected genes (*Zpr1*, *Bud13*, *Gan* and *Cmip*). Direction of the transcription is indicated  
1073 by arrows. Group scaled tag densities on each gene either in mESCs, or in MEFs, are  
1074 indicated on the left. **C-D.** K-means clustering showing the distribution of Pol II and  
1075 H2Bub1 on genes expressed in mESCs (C, 16269 transcripts) and in MEFs (D, 15084  
1076 transcripts) (from -5 kb upstream from the TSS to + 5 kb downstream of the TES) in  
1077 control and *Atxn713*<sup>-/-</sup> mESC (C) and MEF (D). **E-F** Average metagene profiles showing  
1078 Pol II distribution on bodies of expressed genes (from -5 kb upstream from the TSS to +  
1079 5 kb downstream of the TES) in control and *Atxn713*<sup>-/-</sup> mESCs (E) and MEFs (F). **G-H.**  
1080 Average profiles depicting Pol II and H2Bub1 distribution around the TSS (TSS -1 kb /  
1081 +1 kb) of expressed genes in control and *Atxn713*<sup>-/-</sup> mESCs (G) and MEFs (H).

1082 **Fig. 7: Pol II elongation rates are not changed by H2Bub1 increase in the**  
1083 **gene-body regions of *Atxn713*<sup>-/-</sup> cells**

1084 **A.** K-means clustering showing the distribution of Pol II and Pol II Ser2P (n=1) on  
1085 16269 expressed genes in mESCs (from -5 kb upstream from the TSS to + 5 kb  
1086 downstream of the TES) in control and *Atxn713*<sup>-/-</sup> mESC. Two clusters have been  
1087 separated (as indicated) based on the Pol II Ser2P signal accumulation around the TES  
1088 region in WT ESCs. **B-D** Average metagene profiles showing Pol II and Pol II Ser2P  
1089 distribution on bodies of expressed genes (B), Cluster 1 (C) or Cluster 2 (D) (from -5 kb  
1090 upstream from the TSS to + 5 kb downstream of the TES) in WT and *Atxn713*<sup>-/-</sup> mESCs.

1091 The color code is indicated on the right of the panels. **E-G.** Pol II (E) and Pol II Ser2P  
1092 (F) travelling ratios were calculated in WT and *Atxn7l3*<sup>-/-</sup> mESC, and Pol II (G) traveling  
1093 ratio was calculated in WT and *Atxn7l3*<sup>-/-</sup> MEFs for genes expressed more than 100  
1094 normalized reads to the median size of transcript in kb. Kolmogorov & Smirnov test p  
1095 values and maximal distance (max dist) are indicated.  
1096

1097

1098 **Table 1:** Offsprings from *Usp22*<sup>+/-</sup> intercrosses

| Stage   | <i>Usp22</i> <sup>+/+</sup> | <i>Usp22</i> <sup>+/-</sup> | <i>Usp22</i> <sup>-/-</sup> | Total | Number of litters |
|---------|-----------------------------|-----------------------------|-----------------------------|-------|-------------------|
| E9.5    | 3 (16.7%)                   | 9 (50%)                     | 6 (33.3%)                   | 18    | 2                 |
| E10.5   | 5 (23.8%)                   | 11 (52.4%)                  | 5 (23.8%)                   | 21    | 3                 |
| E12.5   | 8 (19.5%)                   | 21 (51.2%)                  | 12 (29.3%)                  | 41    | 5                 |
| E13.5   | 4 (28.6%)                   | 7 (50%)                     | 3 (21.4%)                   | 14    | 2                 |
| E14.5   | 6 (27.3%)                   | 10 (45.4%)                  | 6* (27.3%)                  | 22    | 3                 |
| weaning | 93 (37.6%)                  | 154 (62.4%)                 | 0 (0%)                      | 247   | 37                |

1099 \* dead embryo (no beating heart)

1100

1101 **Table 2:** Offsprings from *Atxn7l3*<sup>+/-</sup> intercrosses

| Stage   | <i>Atxn7l3</i> <sup>+/+</sup> | <i>Atxn7l3</i> <sup>+/-</sup> | <i>Atxn7l3</i> <sup>-/-</sup> | Total | Number of litters |
|---------|-------------------------------|-------------------------------|-------------------------------|-------|-------------------|
| E7.5    | 10 (47.6%)                    | 5 (23.8%)                     | 6 (28.6%)                     | 21    | 2                 |
| E8.5    | 20 (31.2%)                    | 35 (54.7%)                    | 9 (14.1%)                     | 64    | 7                 |
| E9.5    | 13 (25.5%)                    | 26 (51%)                      | 12 (23.5%)                    | 51    | 6                 |
| E10.5   | 53 (28.8%)                    | 83 (45.1%)                    | 48 (26.1%)                    | 184   | 21                |
| E11.5   | 7 (28%)                       | 12 (48%)                      | 6 (24%)                       | 25    | 3                 |
| E12.5   | 9 (47.4%)                     | 10 (52.6%)                    | 0 (0%)                        | 19    | 3                 |
| weaning | 138 (44.7%)                   | 171 (55.3%)                   | 0 (0%)                        | 309   | 47                |

1102

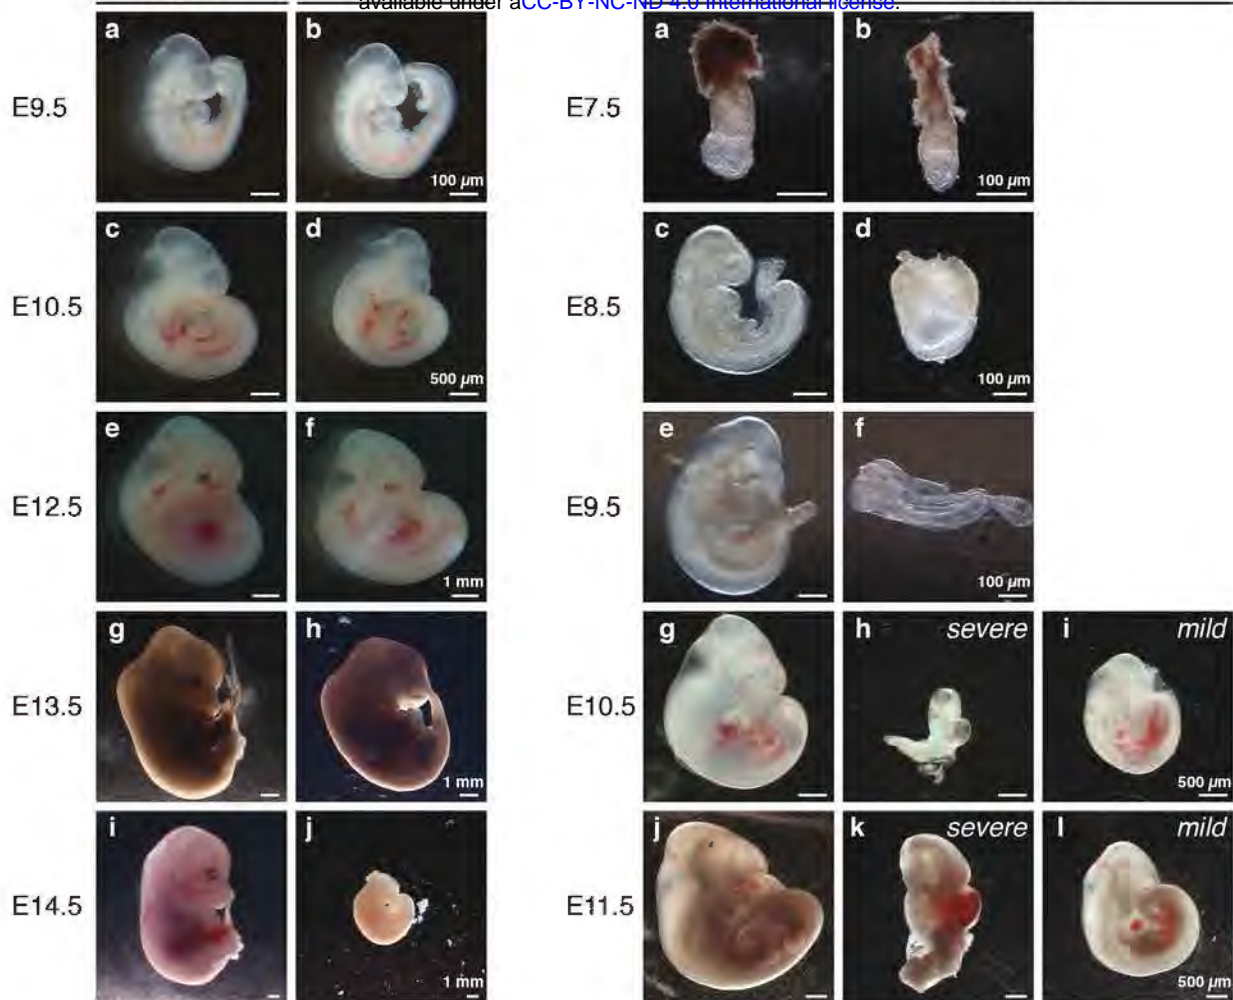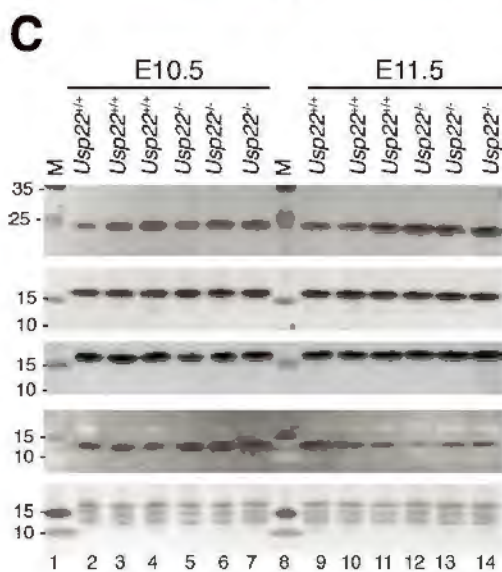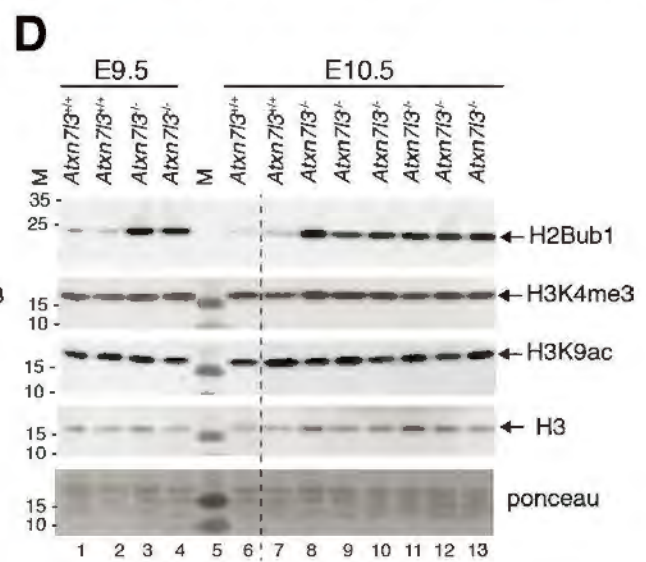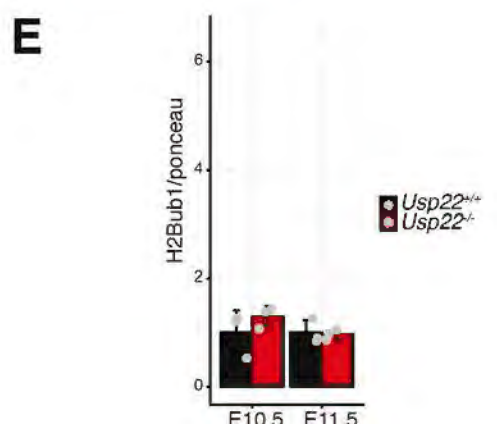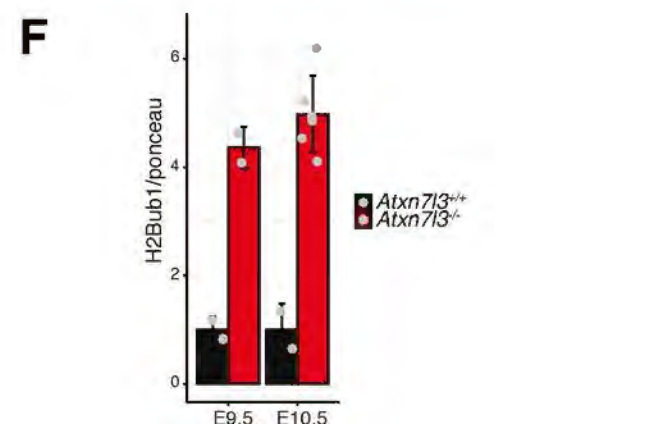

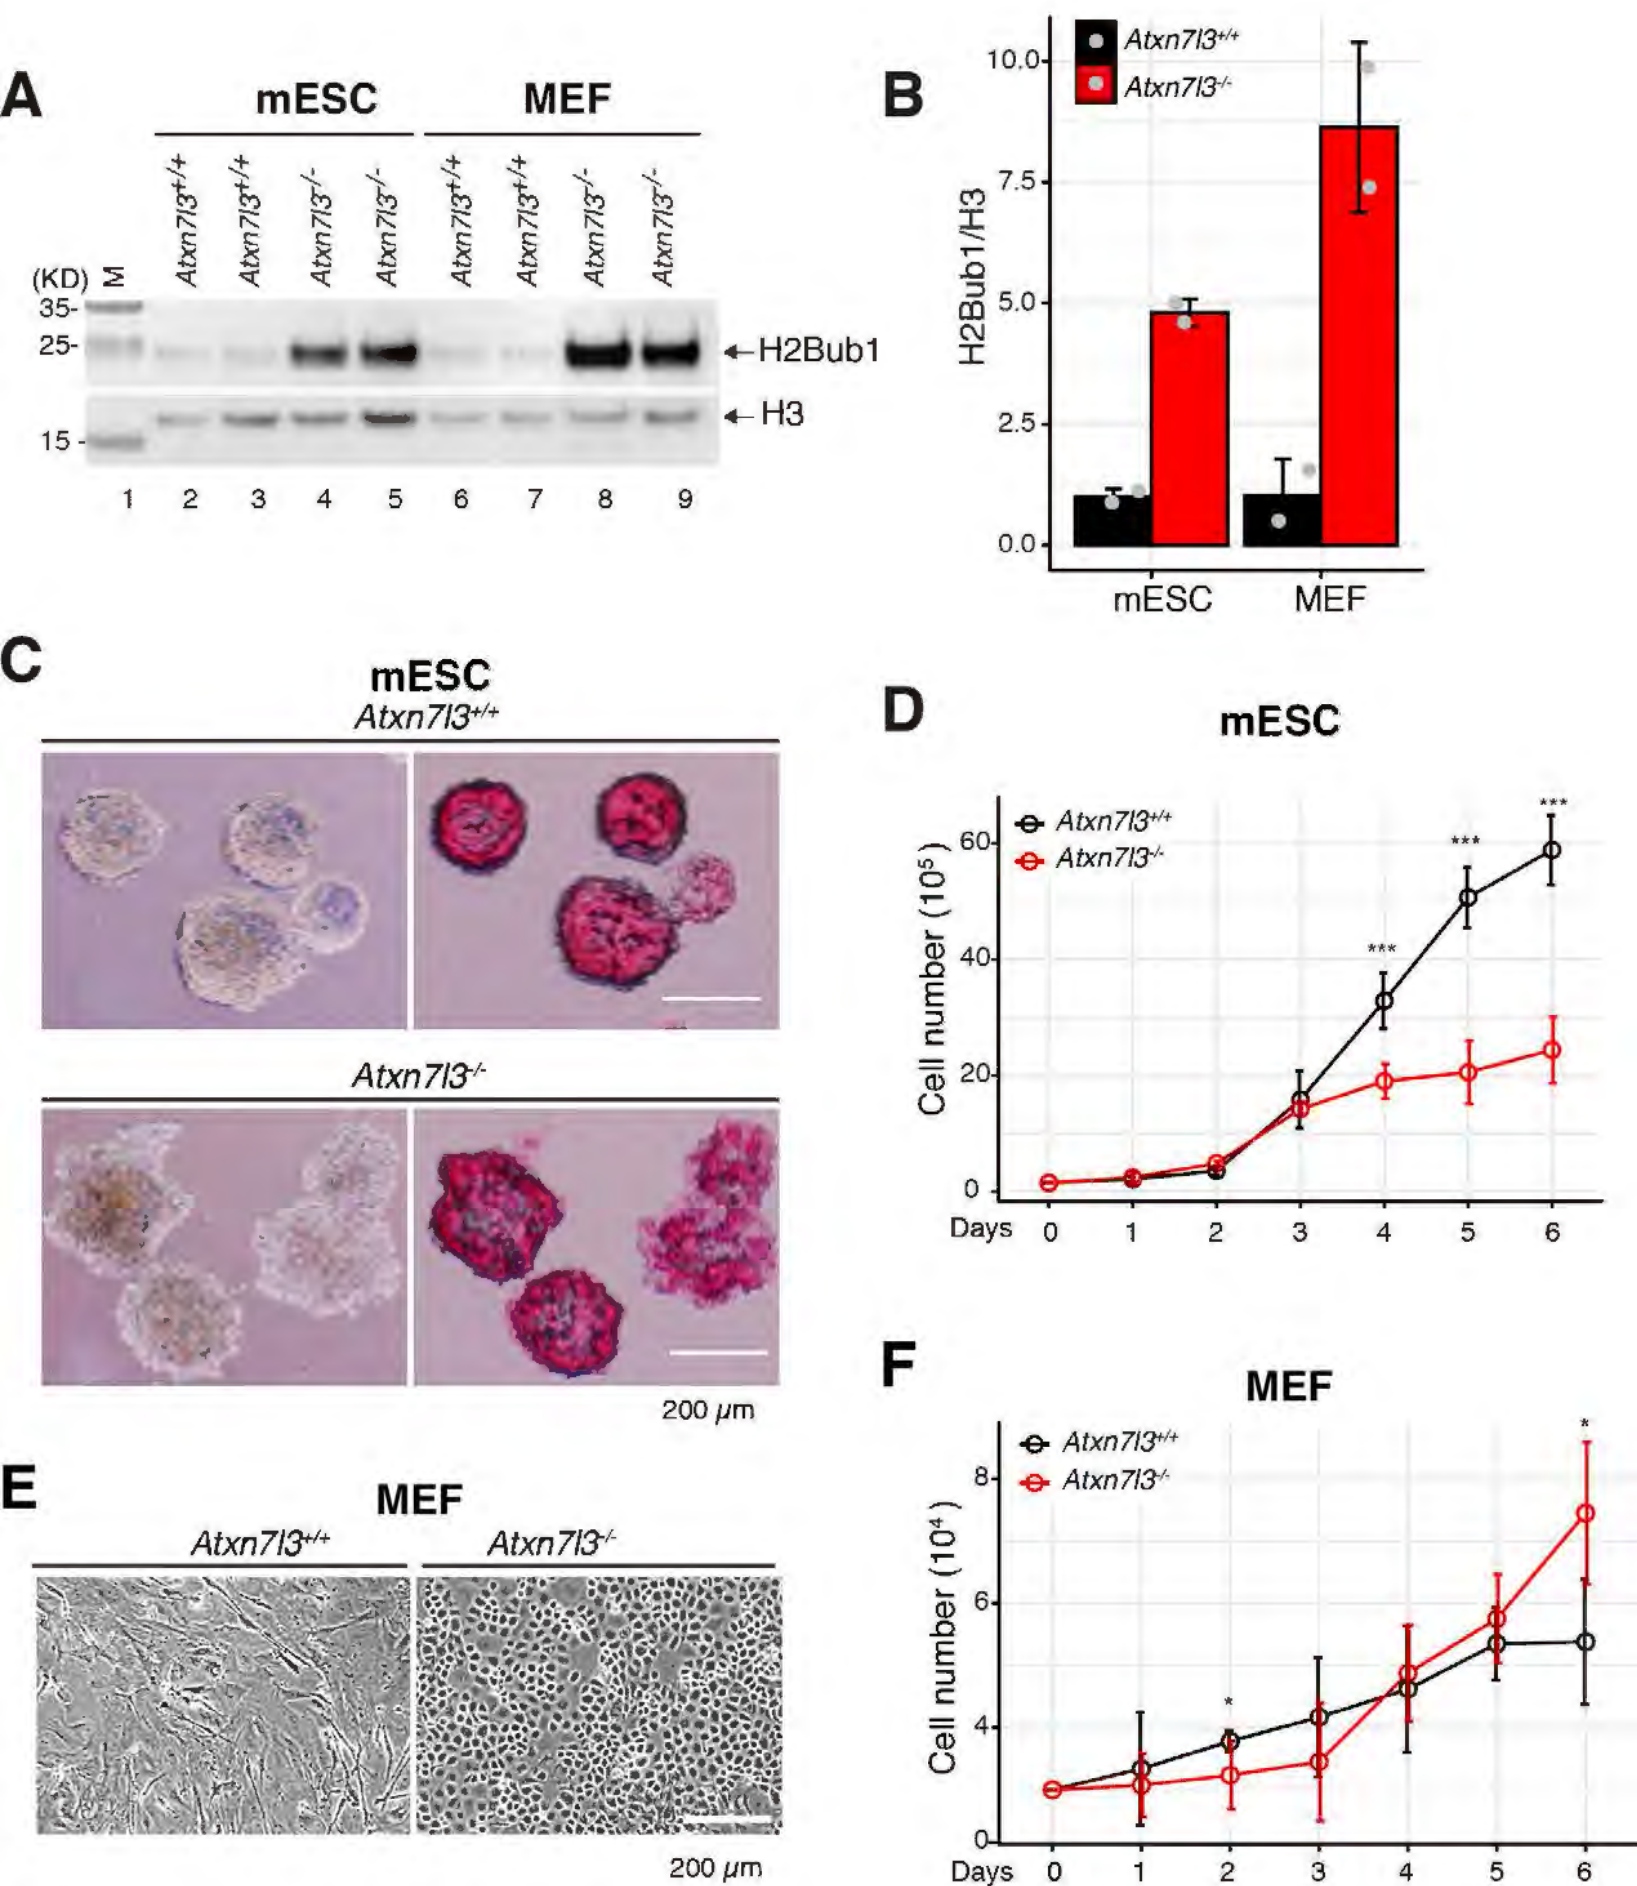

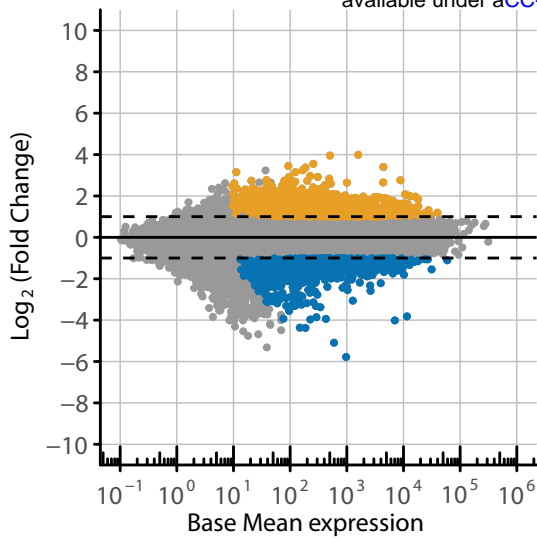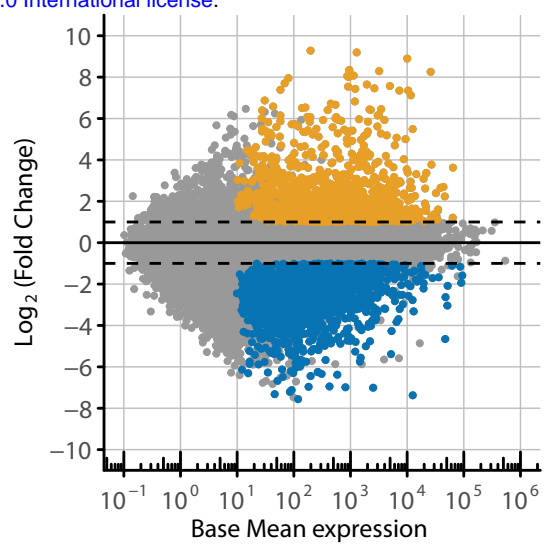

**C**

| Fold change<br>KO vs WT | mESC                           |                | MEF                            |                |
|-------------------------|--------------------------------|----------------|--------------------------------|----------------|
|                         | Differentially expressed genes |                | Differentially expressed genes |                |
|                         | Up-regulated                   | Down-regulated | Up-regulated                   | Down-regulated |
| 2                       | 1116                           | 810            | 1185                           | 1555           |
| 4                       | 99                             | 138            | 479                            | 922            |
| 8                       | 9                              | 29             | 240                            | 452            |
| 16                      | 0                              | 5              | 132                            | 190            |
| 32                      | 0                              | 2              | 83                             | 68             |
| 64                      | 0                              | 0              | 40                             | 23             |
| 128                     | 0                              | 0              | 20                             | 6              |
| 256                     | 0                              | 0              | 9                              | 0              |

**D**

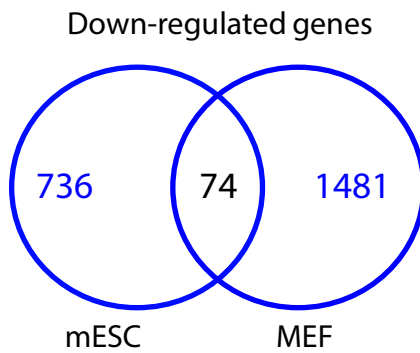

**E**

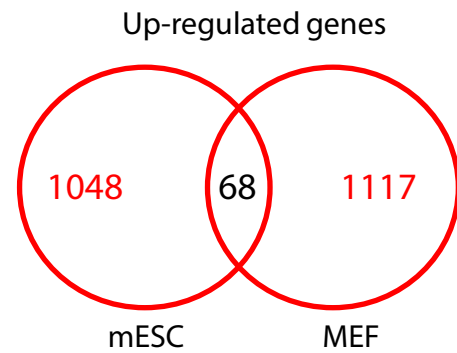

A

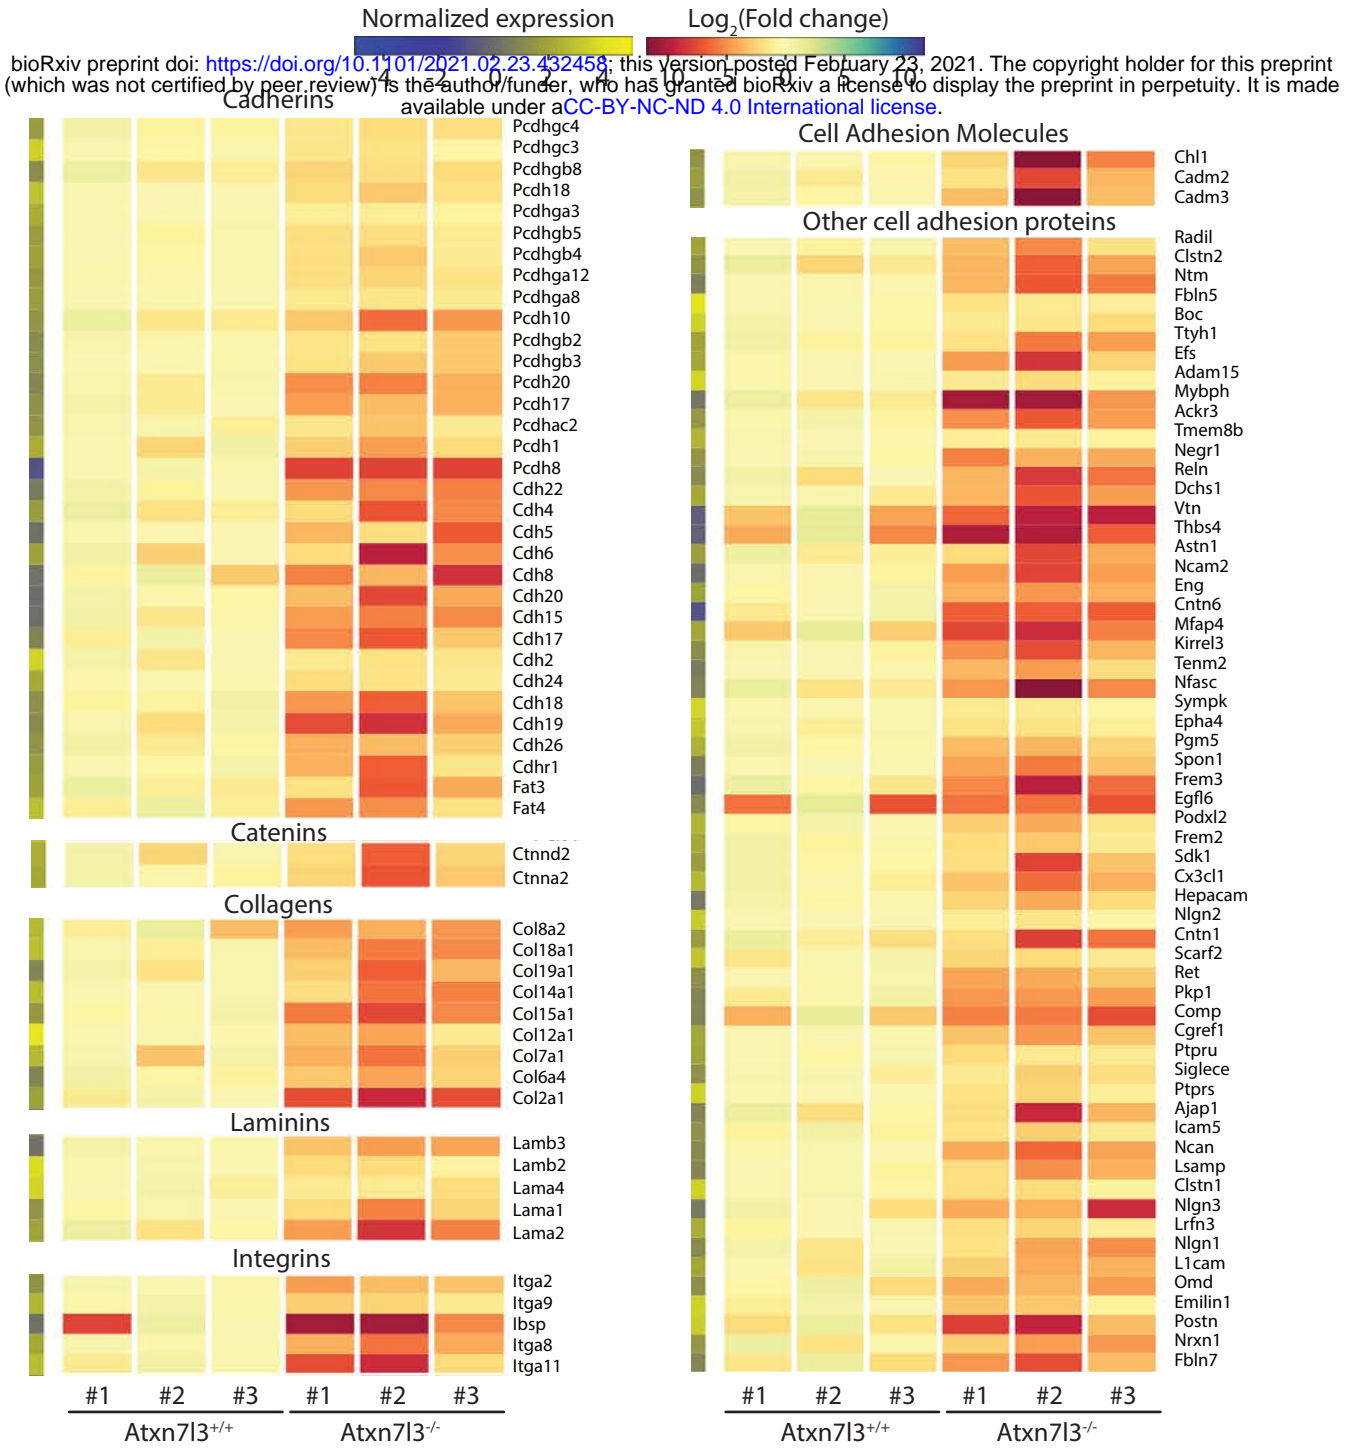

B

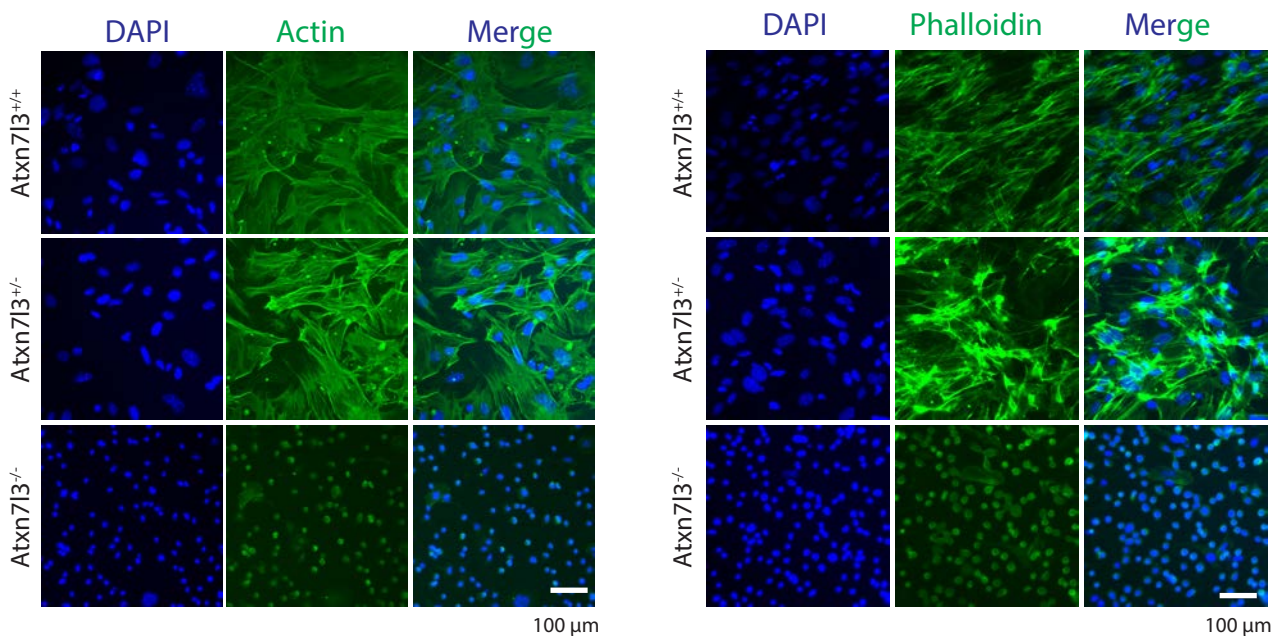



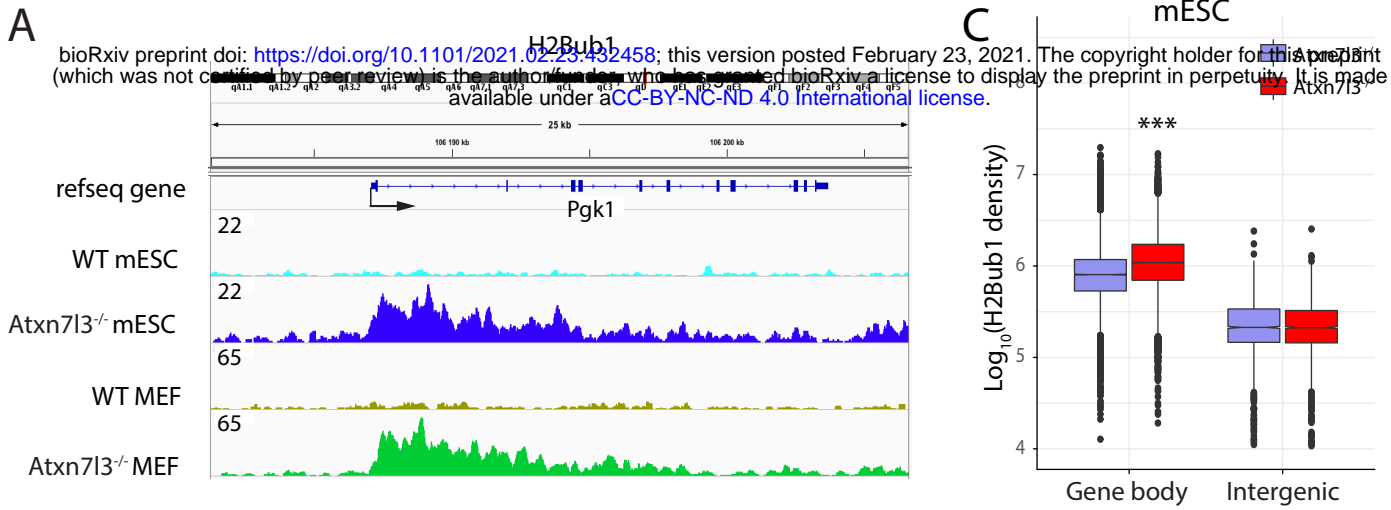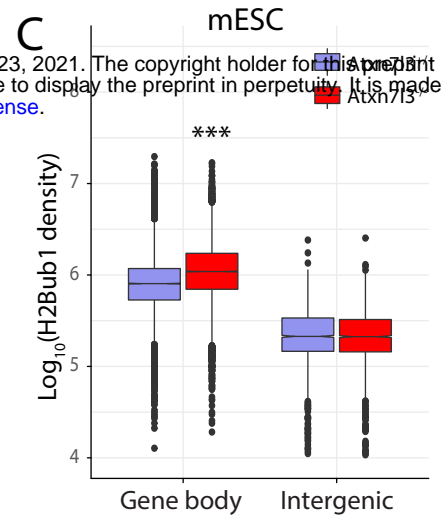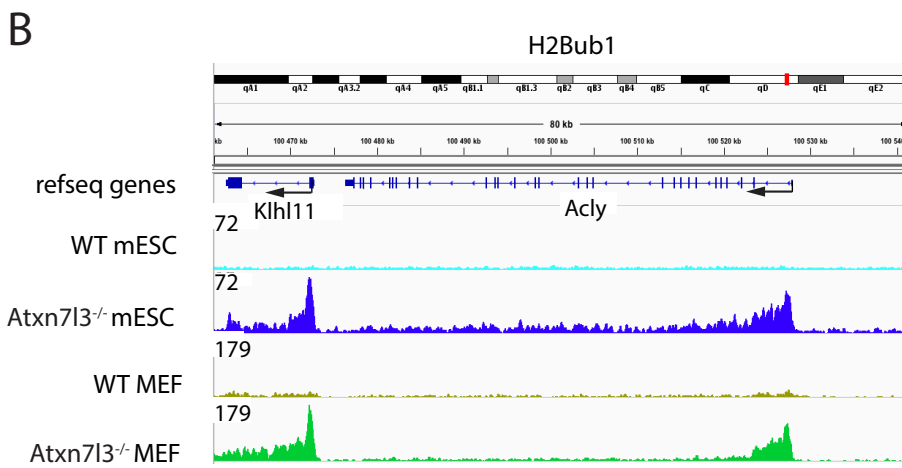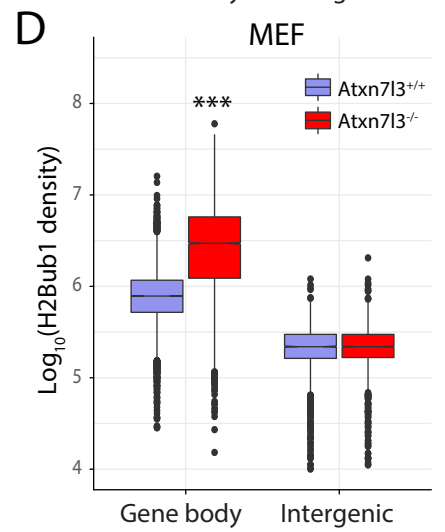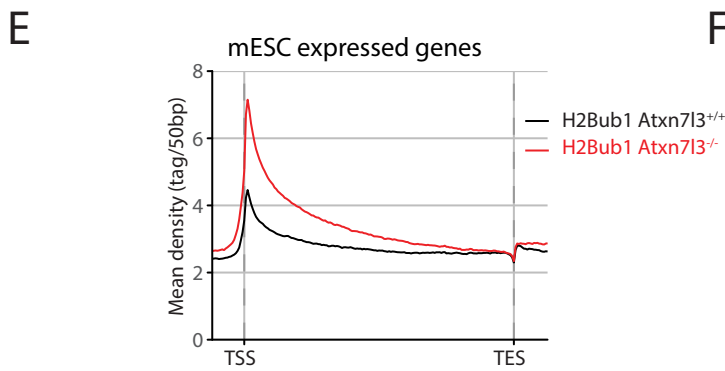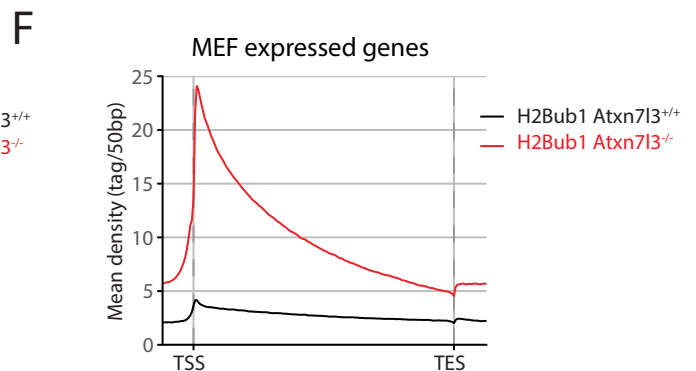

A

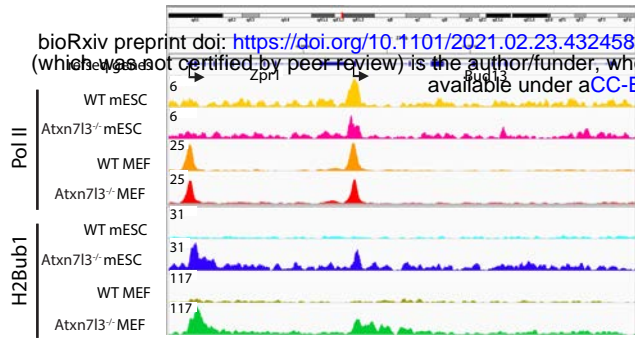

B

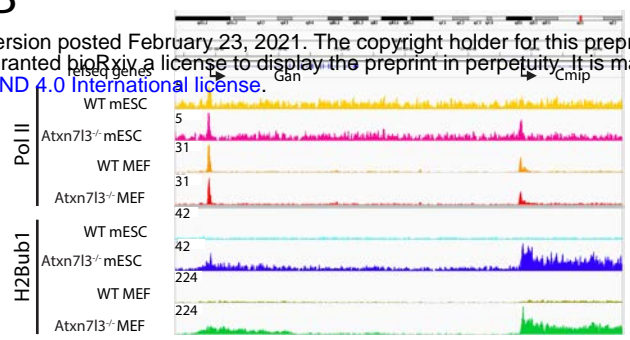

C

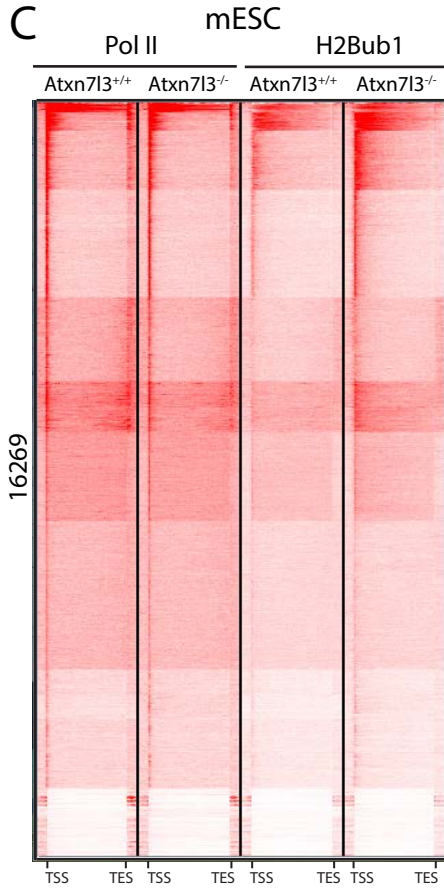

D

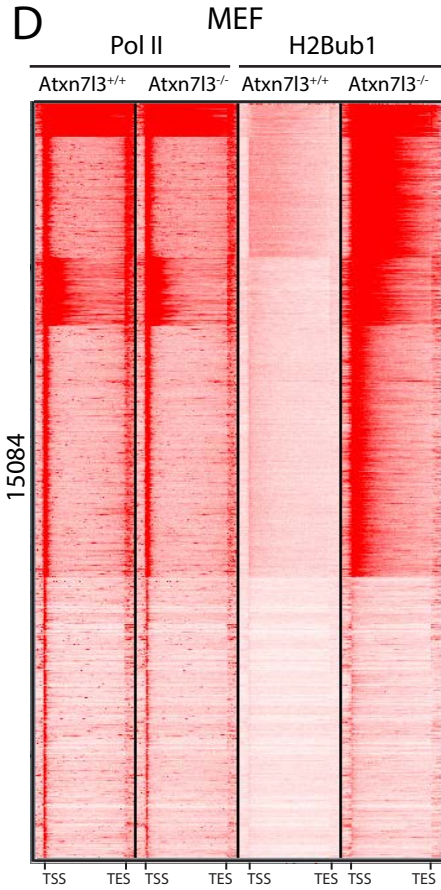

E

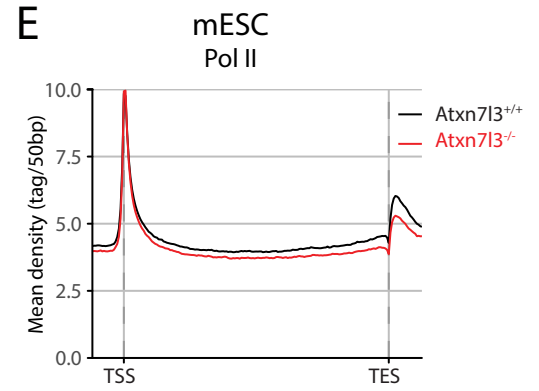

F

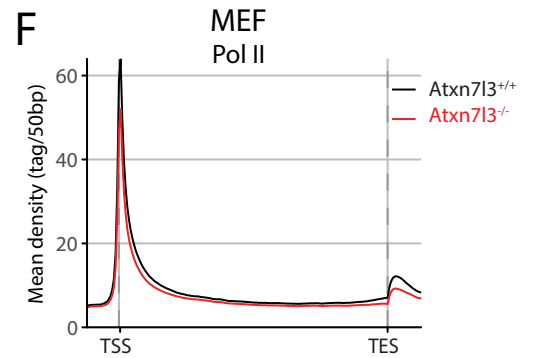

G

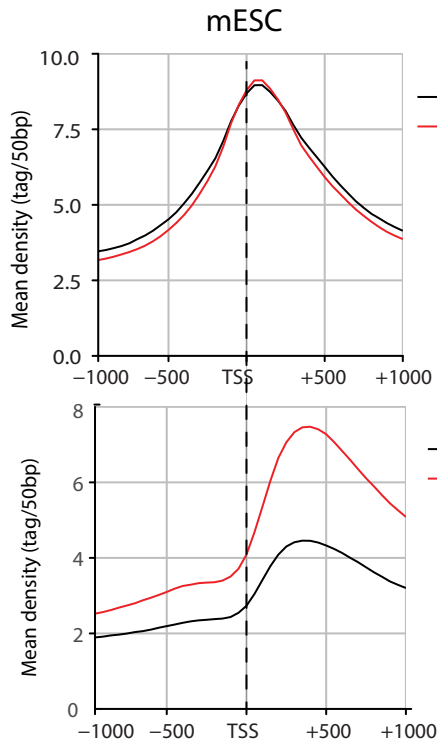

H

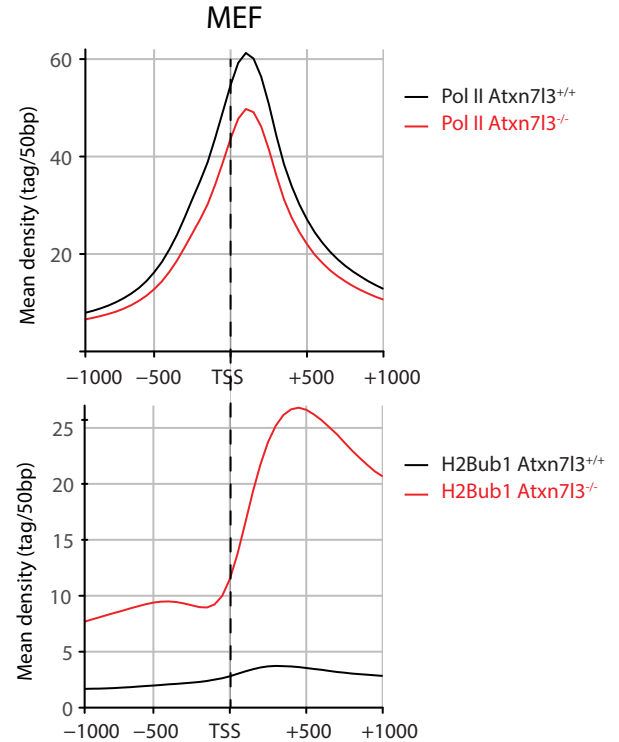

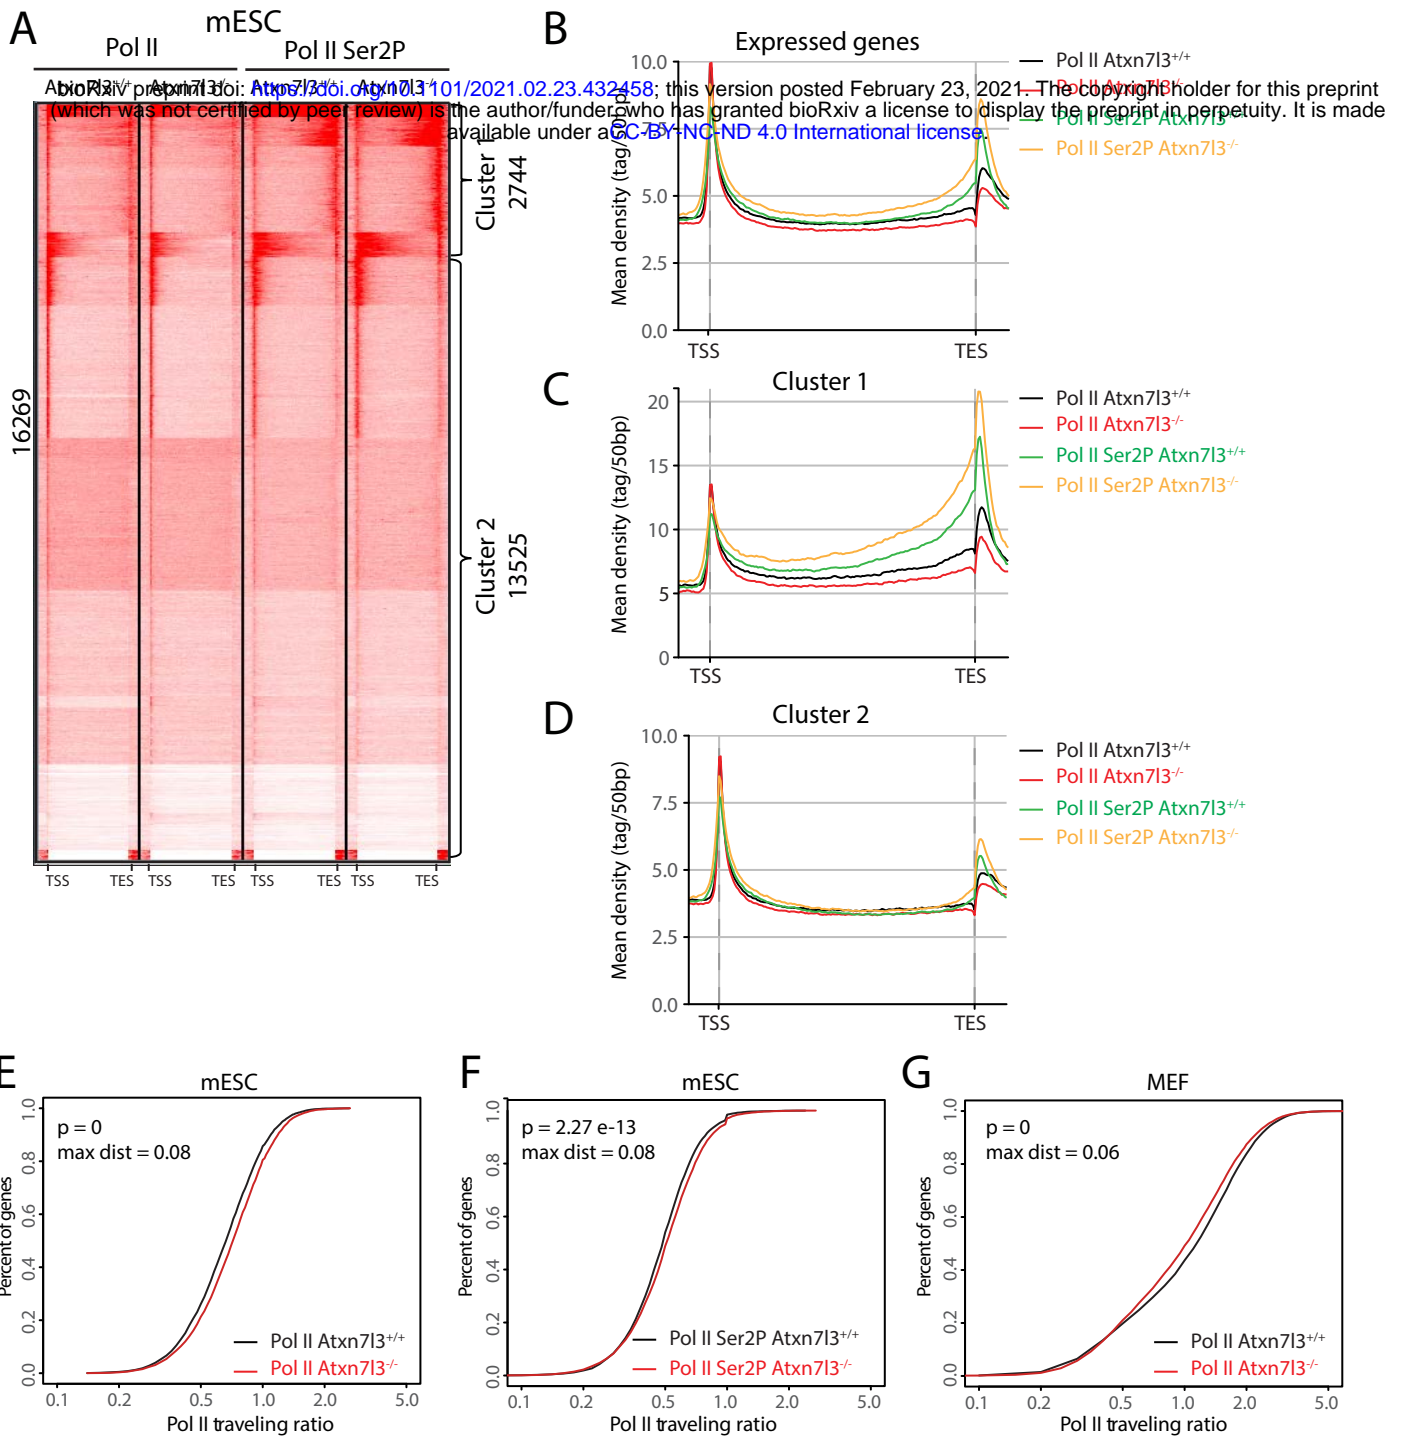

Source: https://www.biorxiv.org/content/biorxiv/early/2021/02/23/2021.02.23.432458.full.pdf
